# Supplementary material for: Discovery of surrogate agonists for visceral fat Treg cells that modulate metabolic indices in vivo
Source: eLife journal article supplement (doi:10.7554/elife.58463), 2020-08-10
Supplement: supp [file elife-58463-supp-v1.zip]

Archive with 9 entries (9 files):
- elife_poa_e58463_Supplementary_file_1.xlsx
- elife_poa_e58463_Transparent_Reporting_File.docx
- elife_poa_e58463_Figure_1_figure_supplement_1.pdf
- elife_poa_e58463_Figure_1_figure_supplement_2.pdf
- elife_poa_e58463_Figure_2_figure_supplement_1.pdf
- elife_poa_e58463_Figure_3_figure_supplement_1.pdf
- elife_poa_e58463_Figure_4_figure_supplement_1.pdf
- elife_poa_e58463_Figure_6_figure_supplement_1.pdf
- elife_poa_e58463_Figure_7_figure_supplement_1.pdf
