# Supplementary material for: Discovery of surrogate agonists for visceral fat Treg cells that modulate metabolic indices in vivo
Source: eLife journal article supplement (doi:10.7554/elife.58463), 2020-08-10
Supplement: supp [file elife-58463-supp-v1.zip › elife_poa_e58463_Figure_1_figure_supplement_2.pdf]

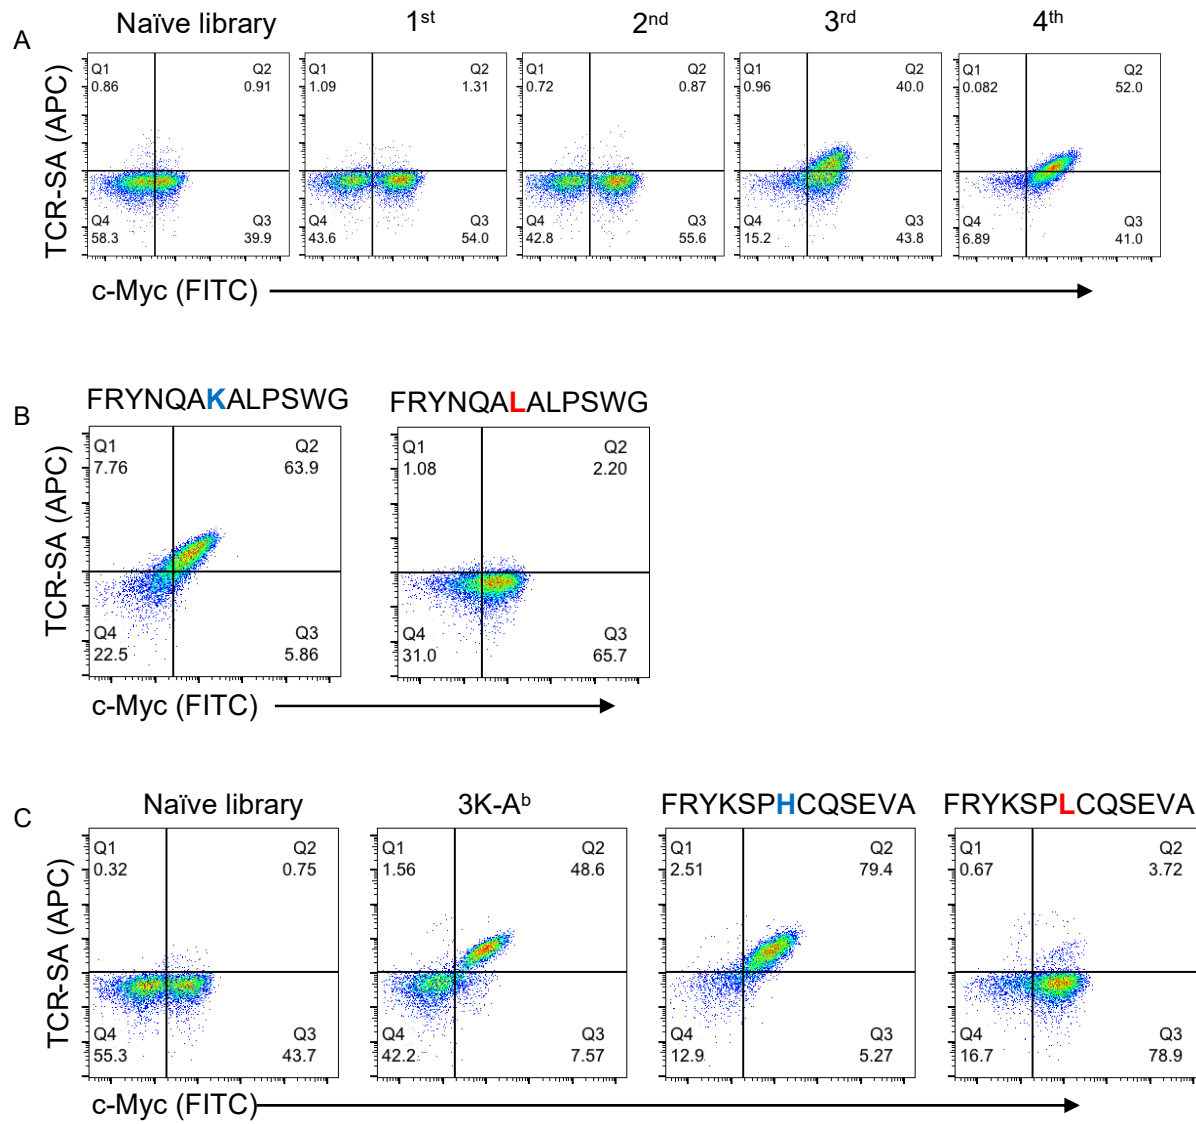

**Figure 1–figure supplement 2, Validation of the peptide-A<sup>b</sup> yeast display platform. (A)** 2W TCR tetramer staining together with c-myc staining is shown for the naïve library and four consecutive rounds of selection of the peptide-A<sup>b</sup> yeast library. TCR tetramer and c-myc staining of enriched peptide sequences (single clones) isolated from the YAe **(B)** or 2W **(C)** TCR selections. Naïve library, 3k peptide and single point mutations (red) in central positions of the enriched peptides were used as controls to confirm the specificity of the peptide-A<sup>b</sup>/TCR-SA interaction.
