# Supplementary material for: Discovery of surrogate agonists for visceral fat Treg cells that modulate metabolic indices in vivo
Source: eLife journal article supplement (doi:10.7554/elife.58463), 2020-08-10
Supplement: supp [file elife-58463-supp-v1.zip › elife_poa_e58463_Figure_2_figure_supplement_1.pdf]

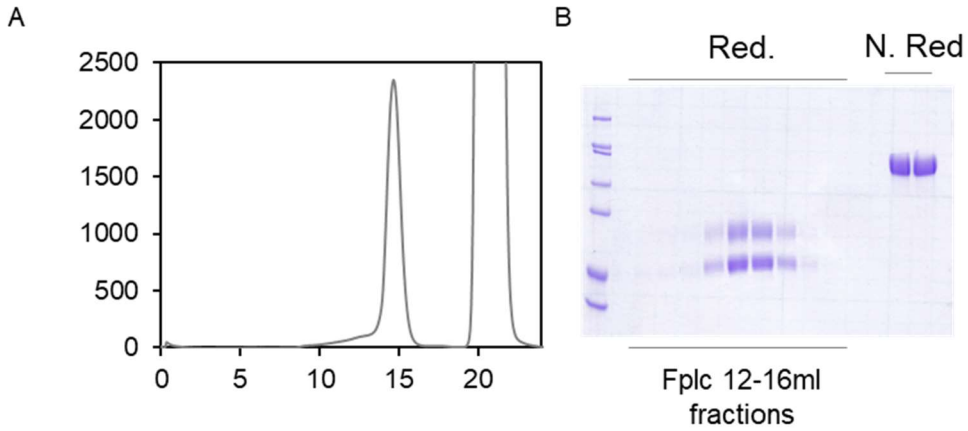

**Figure 2–figure supplement 1, Evolution of peptide-A<sup>b</sup> yeast display.** (A) Size exclusion chromatography of the vTreg53 TCR following purification by Ni-NTA column and overnight biotinylation using BirA enzyme. (B) Reducing and non-reducing SDS-PAGE of the vTreg53 TCR fractions collected in (A).
