# Supplementary material for: Discovery of surrogate agonists for visceral fat Treg cells that modulate metabolic indices in vivo
Source: eLife journal article supplement (doi:10.7554/elife.58463), 2020-08-10
Supplement: supp [file elife-58463-supp-v1.zip › elife_poa_e58463_Figure_3_figure_supplement_1.pdf]

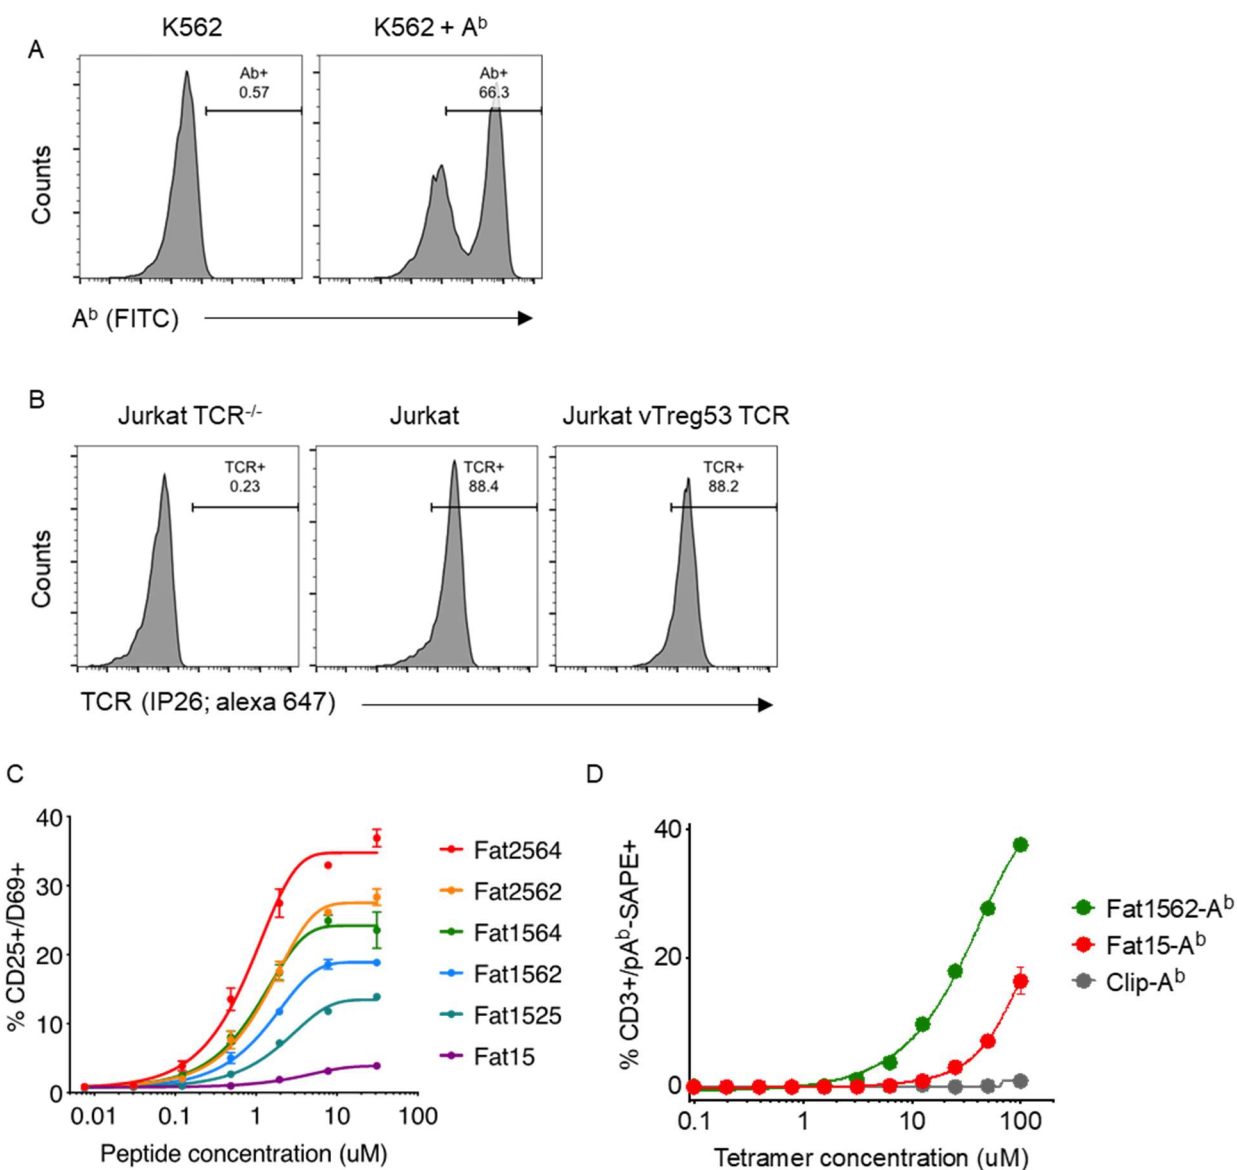

**Figure 3—figure supplement 1, *In vitro* peptide stimulation of the vTreg53 TCR cells. (A)** Expression of wild-type A<sup>b</sup> MHC in stably transduced K562 cells. **(B)** Expression of vTreg53 TCR in stably transduced Jurkat T cells (TCR $\alpha\beta$ <sup>-/-</sup>). **(C)** Fraction of CD25<sup>+</sup>/CD69<sup>+</sup> cells following overnight stimulation with Fat mimotopes at the indicated concentrations. **(D)** Peptide-A<sup>b</sup>-streptavidin PE (pA<sup>b</sup>-SAPE) titration of vTreg53 transduced Jurkat T cells. Cells were stained with 250 nM of pA<sup>b</sup>-SAPE tetramer for 1 hour. **(C, D)** Data are mean  $\pm$  SD from  $n = 2$  biological replicates from 1 representative of 3 independent experiments.
