# Supplementary material for: Discovery of surrogate agonists for visceral fat Treg cells that modulate metabolic indices in vivo
Source: eLife journal article supplement (doi:10.7554/elife.58463), 2020-08-10
Supplement: supp [file elife-58463-supp-v1.zip › elife_poa_e58463_Figure_4_figure_supplement_1.pdf]

Figure 4-figure supplement 1

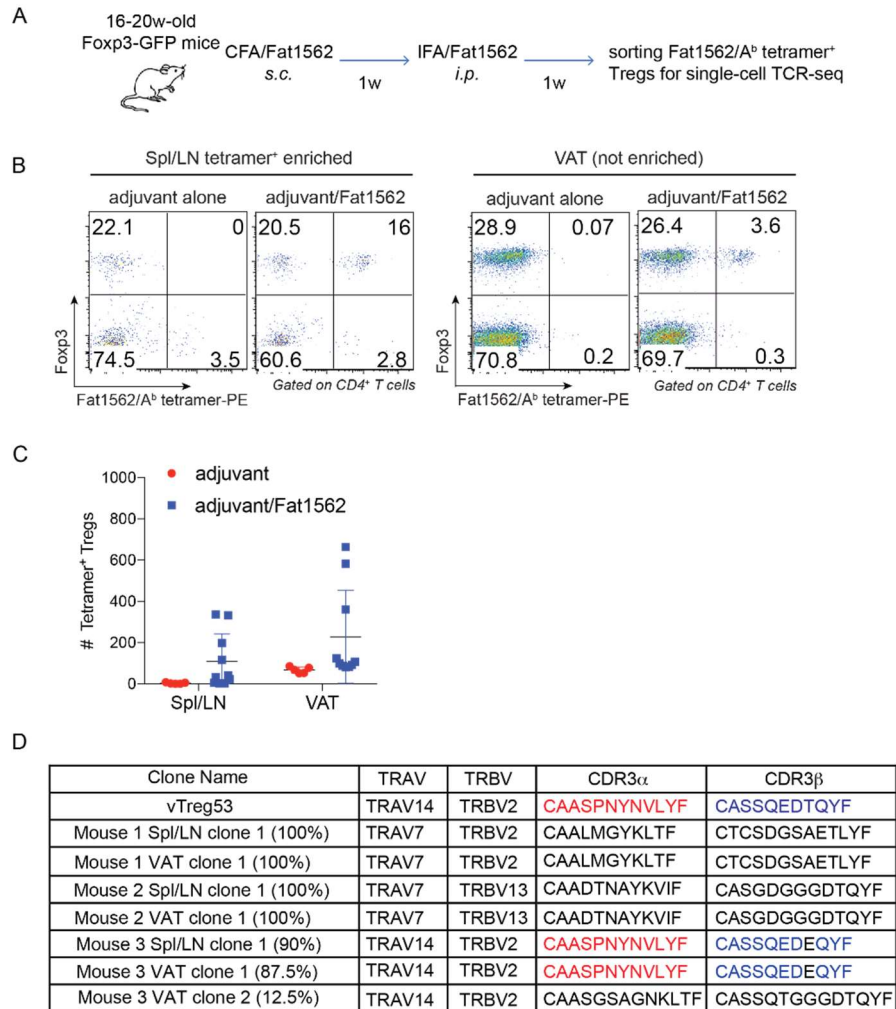

**Figure 4-figure supplement 1, Single cell TCR sequencing (scTCR-seq) analyses of fat1562-reactive endogenous Treg cells following immunization. (A)** Scheme of the experiment. **(B)** Flow cytometric analysis of fat1562/A<sup>b</sup>-PE tetramer<sup>+</sup> Treg cells in Spl/LNs (enriched by anti-PE beads) or VAT (not enriched) of mice immunized with adjuvant alone or adjuvant/fat1562. Plot is a representative of mice that did show detectable expansion of tetramer<sup>+</sup> Tregs. **(C)** Numbers of fat1562/A<sup>b</sup>-PE tetramer<sup>+</sup> Treg cells in Spl/LNs or VAT of mice immunized with adjuvant alone or adjuvant/fat1562 **(D)** Summary of the frequency and CDR3 sequences of expanded fat1562/A<sup>b</sup>-PE tetramer<sup>+</sup> Treg clones.
