# Supplementary material for: Discovery of surrogate agonists for visceral fat Treg cells that modulate metabolic indices in vivo
Source: eLife journal article supplement (doi:10.7554/elife.58463), 2020-08-10
Supplement: supp [file elife-58463-supp-v1.zip › elife_poa_e58463_Figure_6_figure_supplement_1.pdf]

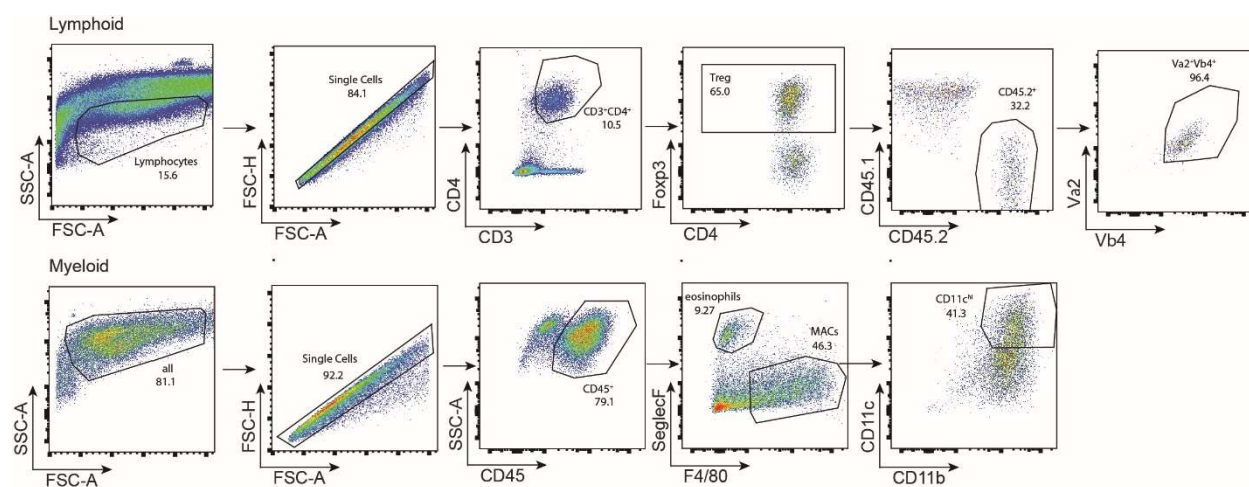

**Figure 6—figure supplement 1, Gating strategy.** Gating strategy used for detection of VAT Treg cells (*top*) and, eosinophils or macrophage cells (*bottom*) by flow cytometry.
