# Supplementary material for: Discovery of surrogate agonists for visceral fat Treg cells that modulate metabolic indices in vivo
Source: eLife journal article supplement (doi:10.7554/elife.58463), 2020-08-10
Supplement: supp [file elife-58463-supp-v1.zip › elife_poa_e58463_Figure_7_figure_supplement_1.pdf]

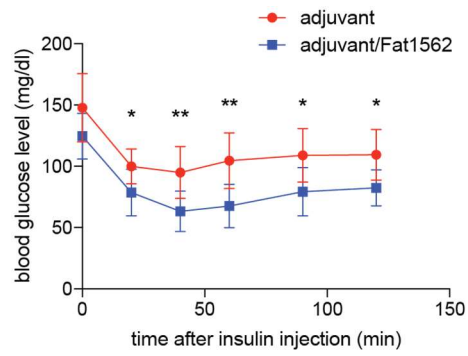

**Figure 7–figure supplement 1. Absolute blood glucose levels.** ITT analysis of mice transferred with vTreg53 TCR-tg Tregs and immunized with adjuvant/Fat1562 or adjuvant alone. Data shown is representative of at least 2 independent experiments ( $n \geq 5$ ).
