# Supplementary material for: Discovery of surrogate agonists for visceral fat Treg cells that modulate metabolic indices in vivo
Source: eLife journal article supplement (doi:10.7554/elife.58463), 2020-08-10
Supplement: supp [file elife-58463-supp-v1.zip › elife_poa_e58463_Supplementary_file_1.xlsx]

## Sheet: SupTable1_vTreg53_selection-GSE
Supplementary File 1. Deep-sequencing of peptide-Ab yeast library after selection with vTreg53 TCR
	Counts
Peptide	Round 3	Round 4
LMFKGPHAVQAVG	536060	755651
TMYKGPHAVAAFT	327847	467607
TMYKGPHAVQAVG	27772	55314
LMFKGPHAVAAFT	19041	36301
FTYKNPRPVAATG	11629	7437
LMFKGPHAVQAFT	263	394
LMFKGPMPCRPSV	197	309
TMYKGPHAVAAVG	125	184
TMYKGPMPWLPSL	126	126
TMYKNPRPVAATG	160	93
FGYHRAWAKVAGG	1567	28
LMFKGPRPVAATG	40	28
LMFKNPRPVAATG	45	27
TMYKGPHAVQAFT	0	42
TMFKGPHVVQAVG	13	31
TMYKSPHAVAAFT	0	40
TMYKGPHAVLPSL	13	20
IMYKGPHAVAAFT	0	49
TMYNGPHAVAAFT	17	23
LMLRGPMPCRPSV	25	29
TMYKGPRPVAATG	0	15
TMYKGPMPCRPSV	0	21
LMFKGPHAVQATG	0	18
LMFNGPHAVQAVG	18	21
LMFKGPHAVAAVG	0	26
LMYKGPHVVAAFT	0	12
TMYKVPHAVAAFT	0	21
LMFKGPHAVQAVC	17	18
VSYFQAIPRAVST	3989	0
FSFPWALATRVSG	554	0
HLFTWAVAYPADA	551	0
FTYAGPLPARVGG	518	0
VSYNFASAILVNS	396	0
SQFYNPMATVVFT	360	0
PDYGWPMPGWVSA	324	0
PFYIDAIAKTAFT	302	0
PMFRVAGPMPVIS	295	0
TMYKGPHAVAAIT	291	0
SGYLFPVARVVSS	277	0
FGYGHASALEAGG	259	0
LMFKGPHAVQAGS	274	0
FAFSFPPPFGAVG	244	0
SEYHGAFAVSASA	254	0
FSFAAAGPRGAAG	231	0
FGFGQAWANAASG	240	0
HVYSDPLASNAYT	202	0
SGFRWPTASVVVT	206	0
RMFFNALPSCVLG	214	0
FGYNYPVAPLVGG	195	0
NKAVDGGGSGGGG	192	0
TCFGSPLARPVLG	198	0
CEFCNACPLMVIA	187	0
GQYKTPCALGVDT	169	0
YGFAYPGAAIVSG	166	0
RGYVSPFALSVNG	154	0
PQFSTALAYSVLS	147	0
SMFKGPHAVQAVG	147	0
ITFVVPSAIMVCS	137	0
VCYNIAGAARVCT	128	0
ITFPSACAGRALG	122	0
TPYGKANAMVVAT	123	0
VVYQGALPVVVFT	124	0
PNFALALARVVFT	124	0
FSYRLALPRDATG	125	0
NTYVRPHPGKVFG	118	0
RLYVRPMASQVIG	113	0
FSYASPNPLRVVS	113	0
RFYMYPFPPIVFG	112	0
SGYVLPCPSDANG	113	0
DDFFKAFALIVNS	111	0
FGFDVAPPASVSG	110	0
TCFYEPWPNGVNS	106	0
DNFVAPNAPIVPG	107	0
INYPAAVAVMAFG	108	0
CAYDHPSPLLVCS	106	0
SMFCWACPGMAVG	109	0
GIYGPAVPLGACS	104	0
LVFGSASPSEVSA	104	0
SVYCRPPPSEVSG	104	0
LQYKGPHAVEAYA	104	0
FYYLNPFPVMVIT	100	0
SPYMMARPSIACS	101	0
GRYSAAFPMQVRS	102	0
HGYRPAVPDDANS	99	0
NSYKIPMAGLVHS	99	0
DEYWYPLATLADS	95	0
NLFDMAMPTLVIT	93	0
YSFKGPHLVQSDG	93	0
RCYSDAGPYSVGT	95	0
YTFACPKASLANT	93	0
GWYGLPIAYMATT	99	0
LAFFRPCAAMASS	92	0
FSFHSARPVSVRS	91	0
FSYQVAIADSVSG	89	0
SKYNLPALVGGGG	104	0
SVYLGPGPSYVST	91	0
PCFDRPRAAMVSG	90	0
IRYSKAWARVVNS	88	0
RAYDQAGPSVVSS	89	0
LVFDHPNAAHVHA	87	0
VMFYVAYALKAYA	90	0
LVYDCACAGPVSS	91	0
FEFLCPYALVVIS	86	0
IRFSFACAFLVFT	86	0
NSFSAANPSRVNA	85	0
LMFKGPHAVQAAG	109	0
VNYCQANPVCVTT	80	0
ADFRTPLASLAYT	85	0
SFYSGATARPAFS	85	0
IGFRYPFARVVRT	80	0
VFFLRAHALTAYG	77	0
YSFECAPPYMAFA	76	0
ALYSTAVALFACS	80	0
DRFHRPYACIVVT	75	0
GDFVDAVPIPASA	73	0
AVYQYAFAAMACA	73	0
DQYWWPYAWTVST	75	0
VLYCGAPPHFVFA	75	0
HLFALALPDTVVT	74	0
IRFCSATATHVHT	73	0
ACYKDPLAGSAHT	74	0
GMYFCAQASSVFA	72	0
FSFGGPHPYRVSG	74	0
AAFVIPEAFPVYT	72	0
IVFGSPVPCGVYT	74	0
FKFCSASPDAVYA	75	0
FGFYLPVAGHAGG	73	0
PSYVTPHPNFAIA	74	0
HAYKRPGPPHVSS	74	0
FQYCKAWAVIASG	77	0
VAFYVAPPLVVSS	69	0
ATYLGPCPPLVLA	72	0
HDYMYPLAWGVTS	71	0
ASYFNPPPMAAFT	68	0
LTFAGALAFQVFT	68	0
TLYVGPVAFVADG	69	0
FRYDNPWPMSVVT	69	0
YCFYFAKAVSVFG	66	0
TRYGMAFASGVHG	68	0
SSYPRPMPILVFA	67	0
HTYMRALASSVRT	66	0
SYYALAMALFVTT	67	0
LTYRLPLPSKALG	66	0
NVFRQPPPGMAIS	66	0
VEYWGANAEQAAT	70	0
INYVVPYPRCALA	65	0
SFYLPPRPNPVDT	68	0
STYNQPMAYTASG	66	0
CTYDGPYARRGGG	88	0
SSYTRPLVVFSGG	66	0
NAYGNALAATVCT	66	0
AIFEEAYALWVFS	67	0
YSFSYPKAYLVHS	66	0
HVSILAGPWMVTT	66	0
SGFVGPLPVLSSL	67	0
SVYGLPSPCPVHT	65	0
GMYRVAVAHLADS	69	0
CSFVNPWPKVVSS	65	0
DSFWDPCAVPVHT	66	0
IRFRYPQAWHVVG	64	0
GCYMLADAMIVIT	62	0
GEFRAPNACRACG	65	0
FGYGSPKPREASS	63	0
VSYNSAQAYGAYG	63	0
GVYALAPAWVVIT	62	0
DTYCHALAVGAVA	61	0
ALSCVAVPTSVSS	63	0
ISYVTARAPRVCS	63	0
SGSVAHCQCCRHW	64	0
YMFMFALPLAVVS	62	0
FGFSMPTPWLAGG	64	0
CFYIMPTPCNVAA	64	0
ACFCPPYAGSVVA	63	0
PPYVKACPVGRQW	61	0
PCYRGPRASSVDG	63	0
YQYTSALAVMVNT	62	0
RVYGIALAHAVYS	60	0
TSFYQPSAIPVNS	63	0
YNYDNARASGVFA	63	0
LNFGSAGAGLAIG	63	0
NGFMGAFPILVTS	60	0
FVYTWPTAPRVGS	62	0
CVYVPAVAVNVHA	59	0
NFYNRPIPASAHG	60	0
GCYDSPPACTVCG	59	0
TPYFNAIAPRVLT	58	0
RSFLVPDPWLVFS	59	0
FSYTLAQPFLVSG	60	0
LSFITAMAERVVT	60	0
NSFKTALAIVVFT	57	0
TIYRQPNACVAHS	61	0
DSFNEASPNRALG	58	0
SCYRVPSAFMVGA	58	0
PGFGNAPPNRVSA	58	0
FQYQRAEPTLAIG	58	0
CVYEMPVALDVLG	59	0
DRFSDPPAPPVYA	58	0
PRFMIPLPQAVDT	61	0
FYYRNPWAVVVDG	56	0
GWYSAANAHLVIT	58	0
LRYYSHWRWFGRW	55	0
GDYLMPLGAGGGS	59	0
IQYRTPGAQVAYT	56	0
DSFNFAYAFLAST	57	0
DSFGHPYPMEVDG	58	0
VLYEIAGAAGAYA	58	0
FAYRRAGAWVVTG	58	0
FVYVAPLASGVST	54	0
HSYCMACAYHALG	54	0
VVYLWALPLRVRT	55	0
RRFQPAVPKRVFS	54	0
FWFQMPLPFSVSS	56	0
NDYNDPVAVKVPT	54	0
VSYPSPVPWSVDA	54	0
LVYGPAMPFQACS	54	0
FEYQGALANIAVD	55	0
NFYSLPLAGTVCS	56	0
VTFVEPVAMLACA	54	0
NSYVLPPALVVCA	54	0
NRFAMALASSVPG	55	0
VHFLVANASHVYA	53	0
ASFSEPVAFLVSG	52	0
RGFFGAIPVRAPT	53	0
NVFSAPVANFAAS	54	0
FCYLLPAPFRAHG	52	0
FAFVGAEACSVSG	56	0
DYFYNPSPKGVRT	51	0
FGSNSPGASAVNA	50	0
YRFADPGPWRVFS	61	0
TPYLVALARDVDS	53	0
AMFGMPCAFNADS	53	0
IAFVFALAIRVIS	52	0
NCYASAWPLKVIT	52	0
PLYIWPCPYLAVG	53	0
PRALIVFTGGGSG	51	0
DGYLNPFAENACS	49	0
NRYGIALARGVLS	49	0
LSYVHADASGVSG	52	0
HSGGPASHAFGGG	53	0
SDFIQALAGVVVA	52	0
LSFLTPTPHIVTT	50	0
GEFMRAVAPLAIT	49	0
RPFFHPWALAVYA	50	0
HRYMLPYPPLVSG	52	0
RAYLCASAACVLG	51	0
DFYSAPIAPTAHA	48	0
TLFSVPKARVAYA	48	0
DFFPYAPPRQAFS	50	0
ISYMQPRASSVYA	49	0
LGYGMAEPWIVRA	49	0
NLYGPPNARPVVS	51	0
LGFHGPRPGTVCT	48	0
FSFTWPKAVSVIG	48	0
FRYTRPSATFAAT	55	0
YCFDTASPIVVYG	48	0
GRFGFPYPSKVSA	48	0
PSTLAVVRAVAVQ	48	0
DQYKDPVPATVYA	50	0
VTFSKPYARSVFT	47	0
SCYYRPIPMGAGT	47	0
NRFKEAYAYHAVS	48	0
AAFDHPCAGAVCG	48	0
PAYGHARALIAPA	48	0
SPFGAPAPELVPT	47	0
HKFCNAVAVCADS	47	0
HLYVGASAFFVDA	46	0
FAFHGAFAGVVYS	46	0
CRYFAALAAGVVG	47	0
GGYGHAHAFMANS	51	0
LYFGLPAAPQVIS	48	0
YKFKTADPFGADT	49	0
SHFRNAHPVLALT	46	0
GKFAKAYPFIAFG	45	0
SPYNFADTGGGSG	46	0
AGYWVAMALAVNS	47	0
LVFSSHAYLVSGG	49	0
TTFSRAGPYAVDS	46	0
SSFRAAWFVSTGG	46	0
RTYLRPPAANAVT	46	0
DSYTLACAQYVAA	45	0
DCCNCDRASSGGG	44	0
YYYITADASLVLT	47	0
FGYPCPAAISAIS	48	0
TIYADALHVFSGG	45	0
RSYGTPSPYHANS	45	0
AWYFWASALRVFS	44	0
YYYRGAEAAYVFS	44	0
GTFLHPSPDRAFT	44	0
DLYWQAGPCFVLS	45	0
TGYCCPVAKFVIS	45	0
HEGPHAVQAVGGG	45	0
GCYALAPPNSVNA	43	0
HKYQVPFAVRVFS	45	0
FPFLYPVPSQAFG	44	0
AAYRPALPDGVGT	43	0
NDYFAPAPVNVNG	42	0
SSYDIPTPVSVNS	43	0
GAFVSAAAYVACT	44	0
GRYNHPQAGTGGG	42	0
YQFFLPGAWRVCS	46	0
SGYLRAIPVYAYS	43	0
DWYVFARPTSVYS	46	0
ISYNSAVPLSANT	42	0
NSYVPPTALSVSA	45	0
SFYDYAGAWGVSS	44	0
TSFRNADAVTVSA	43	0
VVSQAALASLVSS	43	0
CDFMIAFPLVAYA	43	0
FVFRSPVPSTAVT	43	0
FSFSKPFPGVVAG	43	0
AAFLTPWADCVVT	43	0
HDYLLPLPSSVDA	42	0
FPYGGPHPCHVCT	41	0
CCYHPAEAGLRWR	41	0
LCFVEAYAASVSA	43	0
FEFISACPGPVSG	41	0
TLYGMPLPCRAFA	42	0
GQYSAAQAPRVFS	43	0
PPYTHANPVHVGS	43	0
TAFSLPVALLVNT	43	0
TWYLCPWPISVGS	42	0
YNFGPPHPYIAGA	41	0
CRYAAPVALQCGG	42	0
PAFLIPLACRVFT	42	0
CRFGNACASYAHA	43	0
YHYNRACALCVFS	43	0
YGYDLAVPGPVYS	43	0
YAFKPAFPFITGG	42	0
CLYVSPFPLRVDG	41	0
HIFWNALATPVYA	42	0
IYYCCPYASTAVT	41	0
FGYGCDIAQAVGG	48	0
CIFSGAPPNCVNA	41	0
IWYSKPLPILAIA	40	0
IPFIRPVPQFVVT	40	0
FYYSDAGASTVVT	40	0
YPFACPCPTIVNG	41	0
RGSVLSGGGSGGG	40	0
RHYLLPSASNVLA	41	0
CIYSSAAASSAAG	41	0
SSFRAASVDAGGG	42	0
SEFYMASPLLAFT	43	0
DKFLLALPPRAFA	43	0
ITFSCPCPPFVDS	40	0
YGFVWPFPLYVVG	44	0
RFFSNALADAVDA	40	0
ALFEMAAACVAIA	42	0
SLFCDALCWRWFG	42	0
CEFACATALIVLS	40	0
LYYRMPSPLKVPT	40	0
TAFSTPCPGSVSG	40	0
NTYSGATPNSVYG	40	0
LEFNHPHALVAST	41	0
ATFTNPWAENVSS	39	0
TTFCKATPWYATT	42	0
CRYWRAMPHSVVA	43	0
FHYLGAVPSKASS	40	0
VNFEPAGAFEVIS	39	0
VTFNIPSPILVDA	42	0
FSYRPANPTTVLA	39	0
DEFREPPALQAST	39	0
RVYDIAEPKDVSS	40	0
NSFGWAVPSHAIS	39	0
FVFSVAGADWVGG	41	0
IGYACPWAFEVVS	40	0
SRCWSAFALCVLA	43	0
FPFSCPEPLEAST	40	0
FSFIAPRPSQVAG	41	0
NNFHRACALYVVT	40	0
DGYFPPVAVHVNT	40	0
FSFDRASPHCAIG	40	0
NSYRDAIPERVVA	40	0
YVFGTATACYVFA	39	0
CSYTSPFPGVVFT	39	0
CFFAIPGANFVVS	40	0
CVYSIPGPYDVIA	39	0
RHFSEAVACFVIS	41	0
SGYLGPSPLAAPS	38	0
GYFGIARPDWVIG	39	0
DGFSEASPSKVFG	40	0
GAYWVPWPVEVIT	39	0
PFYRLPYAHHVAA	38	0
CVYCKARAVCVVT	38	0
PVFSSADAFRVSS	39	0
RDYCYPMPLCARA	39	0
NYFERALAEDVPT	40	0
CGFDMAIAYDAYT	39	0
VNYGHAVAWTAIT	39	0
NRFSHPRALIVLA	38	0
AYFYGPGPFGVGT	41	0
DLYDLPVPVLASA	41	0
ADYVVAFAMEVIG	39	0
SRFPRPVPTWASA	38	0
AGYMQADAYVVIT	39	0
HHSLVPLPRVSPL	41	0
LVFGLAVPSFACT	39	0
PRYLDPWPSMANG	37	0
NFYCQANPSVVVG	37	0
LSFTYPVPISVHG	38	0
ACYRFAGAGVVFT	38	0
LGYTHAPPNRAYS	40	0
FSFVRPVPSPVGG	37	0
CHFGLSACTVSAG	38	0
YAYVFAFPVIGGG	38	0
HRYFAPAAYRVAG	38	0
IISMNATPVGVLG	38	0
VTYLHAIAPTAIA	38	0
SVFTSPSAKHVTS	38	0
NAFTLADALRVAS	42	0
YAFPSGRVTSGGG	37	0
VMFAQATPGYVIS	41	0
RIYAFAWPPRVRA	37	0
LDFLAAYAQIANS	38	0
HSFDQPAPLTVCT	39	0
TWYNGPCPGNVVT	40	0
YLCLMAVPNAVSS	38	0
PVYNRATPRPAVT	39	0
CTFVSASPGNAST	37	0
IIYPQAMAFSVIA	38	0
ALYCYPSARVVIS	38	0
FSYSYAVDGQVPS	37	0
GVYYTAGALIAFA	37	0
GMFPDALPFQACT	39	0
IEYKIAFPGKAHA	36	0
PDFAAPHASRVAG	38	0
GSYVPPCQVSGGG	37	0
RTYVRAIPWVATS	37	0
IGFMDPCALRVDS	37	0
FSYPYANPLAVGG	41	0
HLYVIADANHVRG	37	0
IRFMMACAMGAHA	37	0
FEFGMALAFNVDA	39	0
DTYSRALPNRVDT	36	0
HVFMNARAIIVVG	36	0
GVYHSAHAHSANA	36	0
RPYAGPWPWLANS	38	0
SSFVMAKALLAST	38	0
YMYNNASPVGVIG	37	0
NGYMNAWPACAFA	37	0
DSFDRAGPFCADS	36	0
DVFRRPIALLVVG	36	0
LVYSEADPSKVYS	36	0
HIFSGPFAPDARG	37	0
AFYNPAGPKLVFA	39	0
TVFRYPTALWVNG	38	0
ISFFSAPPMRAVT	36	0
LFFTCAAAPVAHS	39	0
DGYWIPLAYLANT	37	0
SRFIGAVAHVVNA	38	0
CNYDGAKPVTVIS	38	0
DLFVQAVALEVYS	37	0
FGYSWAYSSLVSG	36	0
SSFDRAGPLNVNT	36	0
NWFASPLALTVYT	38	0
STYELAWALEVCS	39	0
CGFSRAPATSVDA	36	0
NHFRSAGAYAVRS	36	0
LAFCLALPVWVDS	36	0
HDYHPALPPAAHT	36	0
DSFNVAGPVFVFT	36	0
VWFQCPSAKDAPT	39	0
TVFVSAFPVCVNG	37	0
SRFSWVATLALGS	36	0
NSFSVPRPRMASS	37	0
LWFGMAVPTMVYG	38	0
SFYAYAFPVVVCS	35	0
AVFRIAGAGSVVG	35	0
GGFTGPCAVYVVA	38	0
HGFNMAYPAIVNA	36	0
VKYARPVAACTGG	36	0
HDFTMAIPRLALG	36	0
ITFASAAAYWVTG	37	0
FAFRMAGPSLVPT	37	0
SSFPNACPAVVTT	36	0
VGYAGPMPLCVFA	35	0
PDFLHASPYVVSS	36	0
PGFAMALPRYVLA	36	0
FVYSAPPAKVVAG	36	0
PFFNVAFASLAGT	35	0
DTFKLAQPIIAGA	35	0
LTYGRADAHRVNA	36	0
FTFTRPSACEVYA	36	0
GCFYPALPFQVFS	35	0
LYYRPPWANKVDT	34	0
PYYSHAGANNVIA	34	0
FFFSEPLPGNAPS	35	0
CTFFLPPPCCVYA	34	0
HIFVIPKARRVPS	37	0
TSFDIPYPRRSSL	36	0
NLYIAAYPIDALS	35	0
STYRDPKAVFVNS	34	0
VTYEMAIASSAYT	34	0
HGYEAPFAVYADT	36	0
NDYGLAWALVAVG	35	0
VGFSLPCPSFAIS	36	0
YLFSQAPATLAHT	36	0
DAFGYAVAPDVPS	36	0
FGFRCAYAMPAVG	35	0
SSYLQPFPPGVVS	39	0
FGFPDAGAVLVSG	34	0
NIFPLACPTNAPG	35	0
ISFSLALPAPARG	34	0
YTFRSPLARRAST	35	0
TSFARATPFLANA	37	0
DGYRDPKAFAVIT	34	0
SCYADALAKRAVS	35	0
SRYGVPQPISGGG	36	0
VIFVVAGPKLANS	35	0
NEYPGAGPCRVSS	38	0
VCFYVAPPMLVSS	35	0
SSYQDPFAFAADS	34	0
VEFRNPVAFWVCG	36	0
TLFAGAMPLRVFA	36	0
RHYSVPYPGTVLT	33	0
ITFFLAPPAMAPT	34	0
YIYVKARAQLVNS	34	0
YKYTCAHAFNVSG	33	0
HRFHRPFPSHVLT	35	0
SSFLLALPVDVFS	33	0
SMFFGPSPEHVYT	34	0
SNFWSPIARQVFA	33	0
CWCASPWPLRADA	33	0
GMFQIPIASSVNT	33	0
INYADANPSWAYA	33	0
FNFLPALPPAVFS	33	0
TGFRNPYAALVIS	35	0
PCFLTARPSMVGS	33	0
NFYNAAVAIEVFS	35	0
VDFVRALAIYAST	35	0
LCYSGAAASCVCA	34	0
FTFWWPIPWRVTG	34	0
YSFTSARPGEVSS	34	0
GLYRSALPHSALG	35	0
FCFVRAVPYLVIT	33	0
TEYNGAFAALVPG	33	0
CIFYIPVALAVIS	34	0
YHYVAAMACVVNS	34	0
CPFGLPRAVTADT	33	0
HWFSSATPLGVYT	34	0
ARFCFPMPCVVST	33	0
FWFPTPLPFTVRS	34	0
LCFLSPSPQAVSA	33	0
RRYPQPNPLDVHA	33	0
CNFACAFPTRVFA	33	0
YEFFTPTPRKVNA	32	0
FGYSLPMAMFAFA	36	0
SLCLAPSAIRVIA	33	0
FDYFGAGARRAHG	34	0
TGYSGPPPLPVCG	32	0
RTYRPAGPLNVYA	33	0
PCYHWPVAQGVLT	33	0
SRFALPGAMAVRG	35	0
IRFLVAKASSVVG	34	0
CVYERAYPPFVDA	33	0
HSYGEATPVAAFS	38	0
RGFYIAVPYMAFS	32	0
GGFCRPAAIFVGG	33	0
HSYFPPYAFSVYG	34	0
YNFVSASAQLVVS	34	0
TRFCFPYAWRARS	33	0
HRFMLALPVSVNA	33	0
VIFVHAFPSVVYS	33	0
CNFTSAWAREVIS	34	0
CPFWWPCPFLVSS	33	0
DKYLAPVARVVPA	32	0
TTYSHASAAYVDG	33	0
TKFFKPCALPVHS	33	0
LRYSCPSPRGVVS	32	0
IKCSRAIPITVYA	32	0
IRSFAAAPRYVYA	31	0
GVSSSAHPFQAYG	32	0
CSYFMPSPVEVIS	32	0
YAFMGPIACMVCT	31	0
FSYRLAAPILVCT	32	0
TRFFAASANLVPT	31	0
HRYQNPQPVIAFT	32	0
GTYSGARASVAFS	33	0
YYYRNPMALSVSS	31	0
NKYSVAHVVHTGG	32	0
SRFYPQVVGGGGG	31	0
HMYRYAQASHAPT	32	0
HCYALPIAYPVPA	31	0
VSYKRPVPRWVCS	31	0
FGYFMPCANCVAG	34	0
VWFNGAHARVVGS	31	0
NHYISAMAILVYA	32	0
HCYGFPQASKVLA	32	0
VGFCLAFPLRAHA	32	0
VEYWTAPPKTAHG	32	0
VVYDPPHAIPVPA	32	0
SDFGLADAFSVLT	31	0
DIYVYAAAWHAVT	32	0
VWFSSAMAVAVSG	31	0
YFYLQAFPPPVCT	31	0
CVYCKAVPHIVVS	34	0
LKFYRPLAKTVCA	33	0
VRFPNARPVCVRA	32	0
YTFVLPRPNRAVT	32	0
YSYLLPPPPSVFA	32	0
VLYHTGAPTGGGS	33	0
RYYCRAGAYLACT	33	0
VIYASPVPKFANG	32	0
PLYENPSARLADG	31	0
GRYLGAYANYVCT	32	0
DTYGRAWALFVTS	32	0
FCFAAARPSIVHS	32	0
YGYRTALANIVGS	30	0
VGFSPAFAMNVVA	31	0
STYCFPGADSANA	30	0
GSYWIPGPYLVLA	31	0
YLFLVAGANMVYA	31	0
LCYSVAPPCFVFA	30	0
RRFYVPCPRQVRG	32	0
HSYQNPEPVRVFS	35	0
LVYVTASAMTVCG	31	0
VSFGWAVALCVVT	32	0
AEFSVALAFLVFT	31	0
DKYVPPWAILVFG	30	0
YRYVTPLAHMVIG	30	0
TYYENANAVSVYT	30	0
YSFDLACASIVVS	34	0
LMFENPSPADVSS	31	0
NYFHYPWAEDANS	30	0
PAFDFPMPSSVCS	31	0
SLYLCPGPNRVLS	32	0
FGYSLPVAVQAGG	31	0
PVYLPAPPKNVLS	30	0
DSYCVAVALRVAS	33	0
CCYGCALPRCVVS	30	0
GGFSKAIPHRVGT	33	0
FGYTRPVSNTVSG	31	0
LSYMRPLPLAVGA	32	0
VHFPLALASLVFA	31	0
LRFKHAQAKEAIS	32	0
YMYVMPNPLRVFT	31	0
HIFTLVDSGGGSG	30	0
LGYVLPWAGAVHG	30	0
AGYLVAAAGVVDT	31	0
RVYRVASAKLVGG	30	0
NIYNAAVPSGVFA	32	0
FVFGGPRAAKVIG	30	0
PFFIMASPSYAYG	31	0
YRYVCPLAQRVIT	31	0
IVFALAVAECASS	30	0
SEYGGPSPHDACG	31	0
FAFGEASARRAVG	32	0
AGFRAPLPYLVFS	29	0
DCFIDPSPLNVVA	29	0
YVYGGPRPPLADG	30	0
FGYVDALPFSVST	29	0
FGYAFALAVRAFA	29	0
LTYYHAVALRVHS	29	0
FSYKPAEAFIAVA	31	0
PLFSLPLARYAYS	29	0
RIYDIALPSRVLT	30	0
GTFDLPWPTGVGT	29	0
YFYLEPRAQTACS	29	0
SWYGYAGPVVVVT	29	0
GVYGLPRPGSVFA	32	0
VMFGIAIPMLAAS	32	0
CEYYVPTASLAVS	32	0
FGFKQAEASIVPG	30	0
NIFQVAYPGQVIG	29	0
DMFVLPSAFLVVG	31	0
RCYLDPLAADVGA	30	0
FSFGEASPIGVGS	29	0
PCYSEALASLVIG	29	0
GTFSGAFALLVIT	29	0
AVFQRPYAAYVCS	30	0
LSFMCPFASRVPT	29	0
RDFVLPAAVSVTS	30	0
VTFVDPNANAVVS	30	0
GFYRRPLAHEAST	29	0
SSFWGPVAGGACT	30	0
FRYFLPFPLLSSV	33	0
IRYFDAVALSVFG	29	0
VDYSVPWADVVCT	32	0
IHFYTAGPMMAPT	29	0
PWFTGAKAGRVIS	33	0
GFFVRAWPVMVYS	30	0
GDYWIPPGSALGG	31	0
NSYFFPSPCAVFT	31	0
SYFTAARPCSASS	29	0
ADFCPAVAIVVFT	29	0
FTYACAKPRSVIG	29	0
LLYAHALAFAAVS	29	0
DHFLSPFPRVVDT	29	0
SLYGWANPPSVCS	31	0
LNYSCARPMMVNA	29	0
ISFVPAAPNSANT	29	0
SYYLQAIPLLVDA	29	0
CLFGFPGPAPASA	32	0
ILFVFPSPFEADS	30	0
ICFSRPRAKDVFT	29	0
DSFDEAAASFAYT	30	0
FRYWTNSAPTGGG	28	0
FEYTRAMAMRAYG	28	0
HSFYLAGAVEAPG	29	0
SACRDPIPVAAPS	29	0
PPYDKAKPHAAHS	32	0
GCFNRAYGGGSGG	29	0
VHYRSPIPWSVVG	28	0
VRFPCALPSHVYT	29	0
CPYLEAYPLSVNS	29	0
LRFEGAVASWVFG	28	0
VTFFFPFALRACS	29	0
RHYMLALAELANG	28	0
CYDWAVPPLVFAG	29	0
GRCVGPSPHEVIA	28	0
HDYSSPVPNAVLS	31	0
VCYGEAYPVRADT	28	0
FVFGSALAVAAVT	29	0
IRFKNAIPLRACT	29	0
GWYDYPRAWVVVT	29	0
FGFPVPSAMSVYA	28	0
GQYSLAGPGMVIS	32	0
TVYLSAHSGGGSG	28	0
NGYDGAWPHFVSS	30	0
YPYPRAVASPAFT	31	0
TMYVVPHASIAIG	28	0
DVYPNALPFPASA	28	0
TGFGQALARYASS	30	0
FSFSRAAACDVGG	28	0
VRYLDALAGPVYG	28	0
RMFAPAWPSFVCT	30	0
VDYMIAFANTVDT	30	0
VVFDIALPFSVDS	28	0
FGYHHPWSHSVSG	29	0
RWFLLPQAKLVIT	28	0
IVYRLPRPAIAFG	29	0
FKYLAATPHYVST	29	0
PEFAFAVAFKAIG	28	0
GQFVWPHPLEVSG	29	0
SSYSTPFAVGVYG	28	0
IDYDPACAWTVLG	28	0
RTFWNASPLPVSS	29	0
HLYICASAVMVFA	28	0
TEFLRPLPYHVYG	28	0
RMFDGAHAELALS	28	0
GPFLRARPLEANG	27	0
AQFVGASPILAST	27	0
NLYGNPNPYKVTT	27	0
TSYRVADPTFVYA	30	0
HDYVCPWALIAPA	27	0
LGFNSALANLVYS	28	0
LKYLYAGAINADS	27	0
VVYAIPLPYVAIT	27	0
SMYSSPCASSVST	30	0
PLFRCPYPFAVNA	28	0
FYYQSAYPSRVPS	28	0
GHFGTPGPYYVYS	28	0
FVYTVAHALIVGT	28	0
IFYDSASAQLANS	29	0
VYYAGAFPCSVFS	27	0
HSYCGAPAMRVFS	28	0
LIYQQAGAYLAIG	27	0
GMYEMASALDVIG	29	0
VSYELPYAHIVVS	29	0
TRYFNPIPITVCS	28	0
SWFSVAGAIMVNS	27	0
TWFLVASAKIVDA	27	0
FQFWCAEPPYVSG	27	0
ACYVVADPVNVTG	28	0
HIFSRPCASRVSS	28	0
INFPPAVAKAADA	29	0
CLFLCAVAILANT	28	0
CGFYGPLPGAVCG	30	0
GMYATPKAGGAIS	27	0
RSFHYAGPSYVFS	29	0
YRCGFTYPRFVGT	27	0
GMFWQAYPSSVCA	28	0
GCFPRASAVNANG	29	0
TLFFCAPPNFAFA	27	0
FRFNHAEPVSVST	30	0
FAFNPPTPALVSG	29	0
PKFDLPLPHQASS	28	0
TTYWSAKAKVARS	27	0
ARFWDAWAVIVSS	27	0
FTVCAGAGGAYGG	28	0
HYYGIPLPYLVSS	27	0
HSFYFAGPTRVST	29	0
ILFGSPPAYAVYS	28	0
GDFGLACPREAFS	27	0
GIYHVPIPQKVIG	28	0
NGYTHADALRASS	29	0
VFYPLPHAVWVVG	29	0
CDYISPRPIVAFS	28	0
CIFLLPGACVVVA	27	0
AKFLRAVPSSVGT	28	0
RSFDIPKPSIVST	27	0
DIYRSAQARKVYT	27	0
IHFVWAFPGVVYT	27	0
TDYDWAGPSHAFS	29	0
VQYYRAVAKMVVG	28	0
LRYRSALPVIVYT	28	0
HVYLSAFPFVAPG	28	0
FEYGFAPPEVVTS	28	0
HVYSVASAYAVHA	27	0
STYIVAPALDVST	27	0
YLFIGARADRVHS	27	0
DEFLRASPYKVCG	26	0
YIFIYPSALVVYG	26	0
SRFEFPHPHNATT	26	0
PGFVTGRHCGGSG	26	0
VLFAVPAPRLVCG	26	0
NEYSRASPLRVIG	26	0
RRFWMAFPPYVYG	26	0
GCYCSASAHAVLT	27	0
GEFRHPRANLVSS	27	0
PSYHRPNATAVIT	27	0
AVYFCAYPLSANA	27	0
FMYPTPLPLAVNA	27	0
GIFEAPVPGLVYG	26	0
SFFSVPSPMVPAL	26	0
YYFGSPLAAIVDA	26	0
FGFNIAIARSVSG	27	0
ALYAIPGAQTVCS	28	0
FMFQGARPTHVRA	28	0
SSFSIAFACKAIS	27	0
NRFCLPTPREAYT	28	0
IRFSSANPGHVFG	28	0
HDYWRAHPIWVRT	27	0
YGYVDPEAYLATG	26	0
VRYCWAVAVDVCS	27	0
DRYHCAAASLAYS	26	0
GGFQVPCADSVST	30	0
VPYWVACPVVACT	27	0
DSYGVASAVFAHT	26	0
AIFANPFPSLVFS	27	0
VNYANPKPSRVST	26	0
FLPRPGVWRWFGG	27	0
LLCVSAVAGVVST	27	0
SSFVRPRALDVFS	27	0
CFFFMASAADAYT	26	0
LGYGHPVASAVCA	27	0
AIFVPAGPTSVYG	26	0
FVFCGAHPCAVDG	29	0
FAFQWPGPGRSVV	26	0
VSYTLALPFPVDT	26	0
DDSVVASPYCVSS	27	0
ITFGFANALWASG	27	0
IVFISPSPSTVFS	29	0
FIFSIASSWSVGG	29	0
LLFHTAVAGCAFT	27	0
RRFYCPIACMVPS	27	0
LAFNHAPPFAADT	27	0
CNAPPVHTGGGSG	27	0
HEFSSAPAYIVFT	27	0
VSYNSARAFCVFA	25	0
FSYPFASAQGVDS	26	0
DSYLFALPRSVFG	27	0
FVYVSALPGYVHG	26	0
FTFCLAYASLVTG	27	0
DKYGLASAVLALS	25	0
RGFSQARALTVFG	27	0
DSSDAPSAGGVFS	26	0
NRYFPAKAGGVAA	25	0
SEFWQACPYHVYS	27	0
GMFHVAVAPQACG	25	0
FTFSPAGPHRASG	25	0
SCYVAAHPRMVIT	25	0
IDFGLPIASSVST	25	0
PFFCLPSPVLAFA	25	0
CIYSPAVAVCVFA	25	0
GWFQIPSAVGVCT	26	0
CSFGPPFPVFAYT	26	0
IWYSQPVAWFART	26	0
YAFNFASPQMVHG	25	0
FFFGGAFADDVNA	28	0
IPFWVARPYRVSS	27	0
IVYWDARPDWVFS	26	0
SSFVLALAKDVHG	27	0
HSYSNPTPFSVDS	26	0
YYYRPPLPKEVVT	28	0
SSFWYAFAKLVFT	25	0
CVFCHANAYCAGT	25	0
GSYYRPLASLVLA	26	0
FVYRSPRALPAIS	25	0
CTYGWALAFSVFA	25	0
DPYLLPNPAAASG	25	0
DKFREPMPYAVYG	25	0
SFYKEPTATLADT	25	0
TIFQRASPRRANS	25	0
FRFFFAPPMMVPS	29	0
TRFSCPSARVAVS	25	0
DSYSEALAEVVFS	28	0
HCYEYASAENVIG	25	0
YGFTLADARGVFT	25	0
FGFEQAGAVGVGG	27	0
CEYTRATAVLVGA	25	0
DYYAHPRADTAFA	26	0
VGFPNAKALFASS	25	0
NGYFHAVASGASA	25	0
SVFKEAIPCQVIG	25	0
CCFSLAAASKVLT	26	0
TSYGIPHPGRVFG	26	0
PPYYAAYPRSVGT	25	0
SRFSRPCPVLVLA	25	0
FLFETACPWSAYT	24	0
DSYIYPVAHGAFT	24	0
LPYRHPLPYEVLT	24	0
CNFRCPEASRVCS	25	0
ATFLDAVAGGGSG	25	0
VLYLPAFAHGVYG	25	0
RAFHVPSPSPAPA	24	0
GNFVYAVAVRAGT	28	0
TWYCPAGAFIVFT	25	0
IYFLDAMAFKVYA	25	0
DNYLYPKAQYVLA	24	0
DYYSAATAYGACS	26	0
NSYDLPARGGGGS	26	0
FVYSEADAVDVST	24	0
YFFPHAPACRVVT	26	0
VVYGYPFFVVSAG	25	0
GRYIGAYPIDVFA	24	0
HAFCGPNPKMVDA	25	0
ATYSWVVAHGVCT	24	0
YAFYNANALSVST	25	0
LCFFLAVASSVSA	24	0
ILFSEPVPLVVCS	24	0
SPFWQPYALIVNG	25	0
LQYKGPHACEAYG	27	0
DCFANPDAPGANA	26	0
LYFAEALATKVCS	25	0
FRYFRPCPVHVYS	26	0
CKFIMAEPVAVYT	24	0
VNYDVALAVMADG	26	0
FHYALAYPFSVST	25	0
RGFMSASPIGAFT	24	0
TVFTKPVPCQAIG	25	0
FSYVRASPWGAHT	25	0
DLYLIAYPLQAHA	25	0
IWYYPLAGCVIGG	26	0
VSYLAASPWWVNA	25	0
VPFWRAVAVGVCA	24	0
DIFNVPTPGLADS	24	0
PKYWSAYPGWVCT	24	0
GYFGFPLPTLACT	24	0
DVFQCAFAKSAYS	24	0
SFFVIASPVVACT	24	0
RIFLSPVVNSGGG	24	0
FFFFPALPTQALG	24	0
PWFCSAWPMLVNS	25	0
RVYCEAHPEVVIG	24	0
SPYVNALAHGVFS	24	0
GEFIVPVADDAFT	24	0
ANFEYPHPWIVLA	24	0
TTYISPVAGFVYT	25	0
FSFACPTPPMVTG	28	0
ISFWKPNPWFVVT	25	0
SYYGCPLTAPSGG	27	0
HSFLHAVPDYVTS	26	0
ITFGRPRPRMVDG	24	0
VMYIPPHPSSVPG	26	0
IQYGWPFACLAVA	25	0
AMYYLPQPYDACG	27	0
LSYGLAYPGRVST	24	0
VTFCPALAIIAGG	24	0
YVYPFPQALIASG	24	0
NEYASACASTVFT	24	0
AYYIPPSAPFVLS	25	0
AYYRFPPPRGVVA	25	0
GPFVYPLASTAIG	24	0
LWYGIAYPVCVLA	25	0
VVFDPPSPWVANA	26	0
ARYDSPTPEQALS	25	0
FMYVVASAATVSG	24	0
RSFHSAFANKVVS	24	0
FRFAAAAPNHVYT	23	0
YPFSNPSPPPVIG	23	0
GHFVLPNARMVVG	24	0
VSFSTPSPRRVNA	24	0
LVYIGADAVNVFS	26	0
IQYCCPRPRKVLA	24	0
FSYDVPSPDRVVG	24	0
RKFAWAIPAMVCT	23	0
PTYMVPDAGPVDS	23	0
SRYTMPIPVGVVT	23	0
FSFTVPYPDNVST	24	0
VHFVKPYAHVVCT	23	0
TAYYLPNALVVDG	24	0
GMYGLPVAFLALS	24	0
LWFCIPFPHRAVT	23	0
SVFWFACANRVDT	24	0
IPYLDPGPCDVFG	24	0
FAYTSPVPCTVLT	24	0
NLFETPPPLRAHA	23	0
NSFMRAVPKLVNS	23	0
CHFGCPLASLVSS	23	0
GPFPTPLPRSAFA	25	0
NSFLLALARMVLG	23	0
FMYTGPKAILVLS	26	0
TSFIFACPLKVVG	23	0
AEYRNARADTVHG	25	0
FVFRDPVASGACS	23	0
HVFTTPVADDVCT	24	0
TRFRQALAELALT	23	0
HIYSLPRAFAVVA	25	0
CRYSAAVALRVVA	25	0
DYYLFASPVRAAS	23	0
LFYKRPSPYLVCS	24	0
GLFGFPRPIYANT	23	0
ILSLFALACTANG	23	0
VCFALPLANNALS	24	0
VLFKLPLAVSVFA	24	0
IVYLSAVAVIAFG	24	0
DWYRAAHPWTVFA	23	0
TSYPPGPVVPPVA	23	0
TQYISADPSKVFT	23	0
VIFGSPEAWMAVA	23	0
DLFKNASPMDVDT	24	0
IRYCMPVAVPVSG	24	0
NTYRYAMPGLASG	23	0
LVYRIAMPMGVGA	25	0
SSYVYAFPVSVYA	23	0
FAFGMAGSGGGSG	28	0
DRYLDAYAFWVLS	24	0
CEYDFPSALWVVG	23	0
CFSSWPAMHVRAG	24	0
FWFAHADAVHVSA	23	0
HYYDTAQPYRAFG	23	0
IVYGSPNPSSAFT	24	0
SMFLNPFPVGVSA	26	0
FFFSVAAAIGVYT	25	0
NAYSLAAPCSVTG	24	0
RCFVLAWPRFAGS	23	0
FCYDSPVACLVPG	24	0
CRFQRAHAMIVAG	23	0
VPFTLALALHVDA	24	0
FFFHLASPVFADG	23	0
VLFQVPFADGVSA	24	0
DLFATPVHGGGGS	24	0
AVFSVPNPVLVYS	23	0
ISYLDACPSRVGG	23	0
FSYLNAWAIEASS	23	0
LLFRMAIALRVDT	23	0
GTFGNPPPTLVLG	25	0
SSFLHAVSSDVTG	24	0
DEFQSPLAGYAYS	23	0
ALFQTAWPPLVVT	22	0
NVYVLACPVQVDT	23	0
DMYAGASALMVNA	23	0
LLFILPCADAVHG	25	0
LLYVHASPQSACS	23	0
CHFFVAMAQWVDA	23	0
YEFFTAEALMVFT	23	0
DIYGFAWPFLALS	22	0
FVYVGAEAGVVSS	23	0
VGFDSAWPLVVFA	22	0
LPFVFACPYRAHT	22	0
FSYQLPCPLVVTG	22	0
VEFELAKARLVHA	22	0
STFWTAVPLWAPT	22	0
GSYRAAAPNTVFA	22	0
GDFLLPGASSAYT	25	0
FSYMRPMADIALA	23	0
ISYNRAFAYYVNG	23	0
VPFPTPIAVSVDG	22	0
AFSPVAQVAYSGG	23	0
FSFIGAMARAAIS	22	0
FVFDNPVALHVTS	23	0
FSFSLPCPLLASS	23	0
YSYRNAIPCPVCT	22	0
YGYVSAAPVNVIA	22	0
LNFGSPSPPMALG	22	0
INFSTAFPSAVFS	23	0
FTFLGPGPLVVAG	22	0
CDYPAPWPCNVSG	22	0
RHYAVASPQDANS	24	0
LSYQLASAITVCT	22	0
CSFLRPHPLSADT	23	0
NLYSEASPVLVSS	22	0
FGYHQPAPGQVIG	25	0
YIFSNAVAITVCA	22	0
CLFRCPMARNANG	24	0
SEFGNAWPCLAGS	22	0
CYYSHPPPYVVAS	22	0
SRYAVPIAGAVVS	26	0
DIFLCPAPSFVYT	22	0
GPFKEACAAIAFG	23	0
FVFTPARPLKVIT	22	0
NTFRWARPGDAST	24	0
SEYELPLATLVIA	22	0
VSFSGPLALHASG	24	0
SSFNAAHAFLANG	23	0
PKFYVPGPVNAGT	22	0
SKFNDAFAGGGSG	23	0
YHFPRAGPRYVYA	23	0
CLFSTAYASSAPS	22	0
IGFVVASPSQVLS	23	0
FDYTHAHAMLVDA	22	0
RTYLCAPAYIAVA	23	0
FTFFVPKAPDVIG	22	0
YLYYDADPLSVST	26	0
YGFVVAVPYVVDA	22	0
LMFPSPLADVASG	23	0
RCFSFPDPLVVLA	22	0
ICFRSAGASTVNA	22	0
PRFNCAEPLLAKA	23	0
HIYGLAIPFLACG	23	0
INYFYPEPLFVIS	22	0
YTFEIAFAAMAGG	23	0
ATFSQLPKLVDGG	23	0
NCYKTAVPWGAYS	23	0
SSFMGAFAATVSG	22	0
RYYNFPYAKGAYA	22	0
SPYVPAEAPSVDG	23	0
FGFVRPNPLPVGA	24	0
GGYAVPLPLNVCT	22	0
FTFLCACATGASS	22	0
GWFRPAGPGVVSS	22	0
LRFVHAHAMSVVA	23	0
SAYLGAPPNLAIS	23	0
AHYRCAVALRANG	22	0
LVFILPRAFAADT	23	0
PHFAHPYALPFGG	24	0
SLYACPTAVVAST	23	0
PRYAVAHAYLVDT	23	0
VIYLVPAPVMVFA	22	0
IYFCRAHAMPVVG	22	0
IAYSQALPHSALA	22	0
DLYRYAWPVQVVA	26	0
IDFWFPIPLFALA	22	0
FLYESPKAQEVNA	23	0
VEYFGALALCAYS	23	0
YGYWLAVASDAST	23	0
DGYDYALASGVVG	21	0
LNFLIPVAFRVIT	21	0
VSFYLAYANLVFG	21	0
APYSLASAASVST	22	0
TRYRVALPPVANT	21	0
FIFMRPVPFVVVT	21	0
GRFVFPYPKGVFA	22	0
VGYCPPAPGNVNS	21	0
TVFARPSGGVIGG	22	0
CFYETASAFPVNG	21	0
ADFIRPFPSTAIT	21	0
LQFVTALALSVNS	23	0
NWYAVALADPVVG	22	0
IRYHCPKAKYVCG	22	0
HQYCCALPYSVFG	23	0
PVFCMPYPASAFS	21	0
ACFASPDPISVSG	21	0
FGFLQAFAMLVSA	23	0
TQYLTPVAFAVCA	21	0
CEFNWPCPITVCG	21	0
RKYFTPQAYAVSS	21	0
RGYCLANPVLVPA	21	0
FHFASAYAPKVFT	23	0
YMFLQACPCLAFA	21	0
SGYDGPLPAQANS	21	0
NYYFRARAHPAYS	23	0
TLFSMAFACDVDA	22	0
FTFKQAAPCRVNG	22	0
FAFYSPAARRAFT	22	0
NVYGAPGPVTVDT	21	0
SRFAIPAPSRASS	21	0
RSYGGAGACSVSV	21	0
FTFWQPSPFEVSG	21	0
IYYHPADAYFVSS	21	0
YVFVKALAWEVNG	22	0
ASFLTALPSNVIT	21	0
GAYPTPLALNVIT	23	0
NLYYVASPFQARA	21	0
PGFYIPWASGASG	21	0
RDYLVAGAMEVDS	22	0
CYFFYACAQAVDA	21	0
CFYAAASRWVLTG	21	0
DYYIQPRAITVLS	22	0
ARFRRPNASHVFT	24	0
SWFLTALPLAAYG	21	0
DFFYPPCAIRVAT	21	0
SSYFRAHPGNVCS	21	0
GRYYYPVPDAVAS	22	0
DAYVGALAKLVLS	22	0
DPYEMPIALIVSS	21	0
RHFHEASPLDALG	22	0
DSYTVAIPSSASG	22	0
LTFCLPVAYVVCA	22	0
VNYNLPTPPTAPS	21	0
YDFMIADPCGVGA	21	0
HVFLSATPLHVST	22	0
VKFSFPHSASGGG	21	0
DLYSSASPVTVNS	21	0
CGYCHAWPVWASA	21	0
FGFPVAPPSPVLG	21	0
CTYVEPLPFSADT	21	0
HPFVIALPTFANS	21	0
VTFRGAMPRNVNT	21	0
YRYLFAYPDGVYS	21	0
SRYWQAIPGRVIA	21	0
SLFGVAFARSVVS	21	0
VRFYFPPPLSVFS	21	0
YNFMWPGAWWVVS	21	0
LHFKGAFAVGVIG	21	0
SNYLQPPPYQVHG	21	0
PHYIGALAFGGGG	21	0
FQFFGAWACVVSG	21	0
FVSYGPLPWRAFS	21	0
NWYCFPHPGLAFS	23	0
GLYRWPWPEWANS	21	0
TAYRSAIPFGVLT	22	0
AKYALPLAFGANT	21	0
YTFCGPVPFLVGA	21	0
FTFGTPSARKADA	22	0
NAFKWPFATPVYS	21	0
HSFCNPCAFRVAS	22	0
GSFTKAEAGLVLS	21	0
DGFFQPWASLVYT	22	0
GCFVMAVARGAFG	20	0
YGFDPPRPISAST	21	0
TCYYPATARSVPT	21	0
DWFSLAIPLRAYS	21	0
PGYVSRGGSGGGG	20	0
VFFRMACASHVFG	20	0
VTYGSAQAVGAVS	20	0
PEYFPAFAIRVTG	23	0
SSYETPMPLSAIA	21	0
FSFLFPMPLTVSG	20	0
HKYFLPFATTVTT	20	0
ASYSPAFPGIALT	21	0
SPYTGANAGLVLS	21	0
CLFGVPNPQYVLA	21	0
YRFCHPSAADVNT	20	0
TEFRDAMALSVFG	21	0
CTFRFPHSVAITG	21	0
TSYKAAAAVHAIT	21	0
CEFYQAGAIMVDT	20	0
NYFYSAWPAMVSS	22	0
NRYNLACAVSATG	21	0
VKYMLPLARWVHG	21	0
AAYCNAYPVLALT	21	0
FCYCDPEPLTVVT	20	0
GWYSGAVADEAHS	21	0
GVYYRPTPCRALT	21	0
ACYNLPDPIDAHG	20	0
GMFLFAVPSHVSG	20	0
FLYATAVPTIACS	21	0
VSFVLAAPCLVLS	21	0
GSFDEAFPASAFT	22	0
SCFSDAVAIMAHG	21	0
LLYETPLPWKVFT	20	0
SVFTVANPLHVNT	21	0
FVFCLASPYAVGS	20	0
SSFMKAKPLMVSS	20	0
NTYYRAYPRAAFG	20	0
CRFECASPWRVHS	22	0
IGYKKPCAGRALG	20	0
NSFRWARPQGVIG	20	0
RRFFWPYAYRVCS	21	0
NMFEVASALIVIT	22	0
IAYSAAFALLAYA	20	0
FGFPGPMARKVGT	21	0
YCFYRPWPIFVDG	20	0
SSYPKPRAHFVIG	22	0
GGFIDALACRVNS	21	0
HAFHRALPQRVYT	20	0
YCFVDAYAGGGSG	21	0
VPYGHPIALYAIG	21	0
LNYAYPRPGRVYS	21	0
VTYFRPYPVGVIG	20	0
SSFVPANPGLALA	20	0
DCYATAYANQVCA	21	0
TGYPAAVALTASA	20	0
PLFRGPCPSPVFA	20	0
CDYPGPFPLSACS	21	0
GIFFVPEAVLVTG	20	0
SSYLRALPRIVYS	23	0
FRFYLPMPKLALT	22	0
VAFSMATPKHVYS	21	0
HIYSTPAPLSVPS	21	0
DIYSYALALGASS	21	0
SHFYQALAMYVIS	20	0
NGYSVAHPHYVAT	20	0
PVYEHAKPTRVTA	20	0
SVYFLPQAIYVVT	20	0
HVYVKPVPDLACS	21	0
VRYYVPNPTMVNG	20	0
CEFLLAAPPFVTS	21	0
SRSEADSGGGSGG	21	0
PFFRSALAFSVHS	20	0
SFFNVALPLLGGG	21	0
HSYAQPLAMFVAT	21	0
ANFCDPCPSIVDA	21	0
NSYRKASPCSVST	21	0
RDYWSALALNAYS	21	0
LGYYRPSPHAAPS	20	0
IGYCSASPVAVDG	20	0
VKYGTPYPQLVIT	20	0
ARYLLAGAGFVIS	20	0
GTYESPAPFIACG	21	0
VRFCSANAIHVVS	21	0
CHYDSAFANTVNG	22	0
NDYLPPTPPMACG	20	0
YRFVKPTPISVCG	21	0
HNFAWPVAGFVIT	22	0
DVYGGPYPLLVDG	20	0
SYYAGADAYLVGS	21	0
FRYYMAVPCTVFA	21	0
SHYDKAWPDGVHS	21	0
LGYVFPKPRLVIG	20	0
RTYDRPRAIRVSS	20	0
NSYATPIPPFACS	19	0
CEYTTPLAWIVIS	20	0
CTFPRAMAKAASG	19	0
LSFQSPLAGLACG	19	0
CFYEHAFPDTAFG	19	0
RMSSGARPCLVVT	21	0
LTYVLASAKLVAG	20	0
DSYVGPGPWYVIA	19	0
PLFHVAAAARVYS	19	0
YLYGDARALGVLA	20	0
DSFSVAHPPRVSS	19	0
LTYGLPLPYAVHT	19	0
TWFWYPYAGKVDT	19	0
CLYECPGAHNAPT	20	0
SSYGRAMAVWVSS	19	0
LLCVRPRALVVCA	20	0
HHFALPSASTAFS	19	0
CLFIGPMAIMVYT	19	0
SMFSMPWPSMVFA	21	0
TRYTIAVPNTVIA	19	0
VGYSRPKPAIVNS	21	0
GDFCIPVAGDVTS	20	0
SVFGSPTAQRALS	20	0
RQFAGALAERVTG	19	0
CNYYSPGPHTACT	20	0
HPFYSPQPRRAYS	20	0
LQYAIPIAVLVSG	19	0
FRYLGAYPHDVLA	19	0
TVYLMPSPTRVVA	19	0
SWFYWPYPVFVDA	19	0
AEFYSACAHIVSS	22	0
GMFARPAPIPVCA	19	0
VVYPVAHAHVVYG	20	0
VTFCQADAWVVVG	19	0
RSYIMANAWCVIG	19	0
FDFRLPLAHNAIS	19	0
TVYAVAWPALVPT	20	0
YCYAEAMASSACS	19	0
YWYLSANPCQVCG	19	0
GAFFIPCPRTADS	19	0
FMFANPLASGVYG	19	0
TDFTMAFPEMVIT	19	0
IDYVALPPFVLSG	20	0
SIFVLAHARYVSS	21	0
CIYVHPNAPLVPT	20	0
FESALPFEVHSGG	19	0
TMYLTPGPTVVLG	19	0
SRYEAPVAGPVNS	19	0
FKFERARARSVHG	21	0
CEYGLASPSVACG	19	0
RSFSMALAWVVNS	20	0
DVFWQPMPPVVCS	21	0
AYFLYAGPLSVIS	19	0
NLYAMPKAIPVIG	20	0
NHFGVARPLCVSS	19	0
YCYAFPKPNYAIS	20	0
YHFRHAMALIVPG	20	0
FRYSHPFPKSVVA	20	0
PSCKVADPLFAHS	19	0
SDYIEAYPKNVCS	22	0
SLSCVAYANVVRT	20	0
ASFDGALPSQVTG	20	0
DIFEVPGAGLVFT	19	0
FGYHYPTANWVSG	20	0
SLYRVASPRTVTG	20	0
VWFRGPRAYCVNA	20	0
NKFFYAFARRVRT	19	0
FRFVSAYAVVVIS	19	0
VRYWRPCPWVASL	20	0
GQFVNPVAGLVSS	20	0
TSFCTAIPMCVGG	20	0
GNYLYPDATLVYG	20	0
DTYRLPMPLSVNS	19	0
VPYLDAFPQDAFA	20	0
CAFQDAEAHVAVT	19	0
RRYRSPYPIHVIT	19	0
SKFTLPGPIVVCT	19	0
SWFHHPVPQGAIT	20	0
FFFLSASPSMVLA	19	0
FNYGPARPLLVSA	19	0
SVFRTASPISVTG	19	0
HGFYVAFPGGVRS	20	0
AFFSHAIACHVHT	19	0
FSFSCPYAMCAAG	21	0
VAFGSPGPLTVAG	19	0
ADYSRASACFVGA	19	0
YGFGIAAAPIVPT	19	0
YTYVCPVPHVVDG	19	0
HWFVAACPITVHA	19	0
VQFHGAFPSGVYT	20	0
FDYALALATMAVS	20	0
STFVCACAMTVDT	19	0
PYYATPGAIEVSG	19	0
IPYSYAWPDKVLG	21	0
ACFIPACADVADT	20	0
DLFQCASAIKANS	21	0
PGFDTACAVWADT	19	0
SVFESATPFHAIG	21	0
VWYVSAIPGYVRT	20	0
FVYMTASPSYVYA	20	0
HVFARPWAFRVIA	19	0
HCFTSPWAKTVDA	19	0
FRYGLPSPINVRA	21	0
CPFCRAYAVGVTG	21	0
YCFWKPCALVVLA	20	0
FFFPHPTALTVFG	19	0
LNFSAAKALWADS	20	0
HLFTIAPPSRAVA	21	0
PYFCMAWAGAVSA	20	0
FYFSAAQAYHVFT	19	0
RCYSNAFAPAAIG	19	0
IYFRKACAVSATG	22	0
VAYLEARPLMVCS	19	0
CCFKLAVPGSAPT	19	0
PIYGDPFPRSVNT	20	0
RPFRNANAMNASS	20	0
SEFSSALPSKVIG	19	0
VRYSSPLACMVHS	20	0
CGFDCAMALRAFA	20	0
PVFRGPVASRVGG	19	0
HIFNSPLARTVFT	19	0
NWYYHPKANQVNT	19	0
CMFWCPYALGVGG	19	0
SYYRNASAWNVYT	19	0
HEFHCPSPVHADS	18	0
AFFLTAYPPSVAS	18	0
TYFLSAVPKLAHS	19	0
NPFSTALPTIAST	22	0
SLFRAYTGGGSGG	18	0
GRYSDPHPADVHT	19	0
TMYKGPHAVAVST	20	0
AVFPRADPFDVYS	18	0
CGYVHAGPHAAFA	18	0
VTFERPLASMACG	18	0
DLYLCAPALLAFA	19	0
YRFTGPAPLGVDS	20	0
HFFGAATPIGVHG	18	0
NDYESPFASFVYS	20	0
ILFDVALAPSVLG	18	0
RVYQLAGAEAVFS	19	0
LRYFRAIPMLVFG	19	0
DAFRGPHAVWVRA	20	0
HVFIYAVAPRVIG	19	0
YDFTSASAYDVCS	18	0
IGFQRPLASTVVS	19	0
FAYPCPNPMCAHG	18	0
YWFRRPSPVLVFG	18	0
AEFLCAVPTLVPT	18	0
IYFVHPGPVEVYA	19	0
SEFLRPLANWVCT	18	0
LTFTSAFAISVCS	18	0
SGYFVPGAFLVSS	19	0
ALFKLARPYRAYG	21	0
LYFTMALPSVVDG	19	0
GLYSSANAITVVA	18	0
DDYSHASPGGVRA	18	0
TDYERPTPLLVGA	18	0
FMYVYAMALKVFT	19	0
FNYWIAPAVDVSS	18	0
GLYYGPNPSKVGG	19	0
DSYALPLALVVSG	19	0
ADYYRAYAMLVFT	19	0
VNFGRAFPGMVVS	20	0
SSCVGAFPLRVLA	18	0
SHFTPPRPTYVVS	19	0
HIYGGALAYDVVS	18	0
TGYVDASGGGSGG	18	0
LSFEIAMAEVARG	18	0
PEYLDPRPASVFA	19	0
IDFSGAWASRVYS	18	0
GLYGGPFARPVSS	18	0
AVYVDPVASPAHT	20	0
AFFDRPVAVRVCS	19	0
HKFCRPLACPAVS	19	0
RFYPDAHAVVVTS	18	0
IFFEVAVAMPVYG	18	0
FRYRAPVPRIVPS	18	0
FSFKYPVPRKAYG	19	0
VQYMDPVASNAHS	20	0
VSYIKARAFRVCT	18	0
SGYVVAEPYSVIS	19	0
TCYYYPSAYAVDA	19	0
NCFARAGPSLVFA	18	0
VLFAKAYACLADT	18	0
FVFGRPVAGAVYA	21	0
IPYMVPTASLVLG	18	0
SRFLAARPALVPT	18	0
AIYSGACAGEVFS	18	0
LIFGDAFAKVVTS	18	0
YQFWRPEPCRVCG	19	0
PFFTPAWPAGVTT	18	0
FAFGGPPPGRVIS	18	0
SDFDNAGPNYALA	20	0
SNYSAAVALHVFA	19	0
TAFHHALPTEVRT	18	0
RLFTVAVPQNVSA	21	0
LVFTYPSACVVLA	18	0
SSYSIPPALNAVT	19	0
VIYGCADAHLVDG	19	0
TLFDGPIPRLAYS	19	0
SYFSVPAAKLVFA	18	0
NNFGHPLAYVVDS	18	0
DSFISAPAALAPS	18	0
CPYRLAFPAVAFA	19	0
VRYYQAPAMYAYG	18	0
PLFLGAVANSVPT	19	0
SNSQYPKAVTVLT	18	0
FWFNLPVARYVLS	19	0
GWYASPRPLKAPG	18	0
RSFFIPNALWACT	18	0
LHYSQPRAHCVLG	18	0
ATFNCAGATDVVT	19	0
ISFRRALPHMAHT	18	0
SGYRHPWAESVVT	19	0
TYFFDALACLVVS	18	0
FQFTPASPFKAGT	18	0
FFYFPAEAVEAIT	18	0
FKFAAPPAPRVFS	19	0
LSYPGPYPMPVYA	18	0
LAFRFAPALLVNS	18	0
NLFAGPLAPHVFG	18	0
RTCRNANANLALA	18	0
LVYHDATPMIVFG	19	0
IRFESPFAITVNS	19	0
IGFMFACATNVYT	19	0
DCFLMAVAAHVNT	19	0
RTFMIARALSVIS	19	0
RWYDKAPPGNALT	18	0
AAFLEPFPSPVVA	19	0
PSYGSPPATSVRT	20	0
NTFVFAFAFSADS	18	0
DTYGMAYPEGVIG	18	0
NAFYPAVAYMAHT	18	0
TTFKGAMPGGVCS	18	0
LPFANAGAGIVSS	18	0
HCYEAAAPIQVDG	18	0
GCFLPPLASTVIT	18	0
HRYVLACPLFVNA	20	0
CLFVIPSAHEVSG	20	0
STFLFAPPPVVSG	17	0
DFYCYAYANRVRT	17	0
VLYYLPHAPLVIT	19	0
ACFEHASAMEVPS	19	0
PGFGFAPPTLVYS	17	0
HVYADAFAMLASS	17	0
IRYLSASPWQAYA	17	0
SDFKPALPCCVPG	17	0
DYYVAPVPSLASG	17	0
LRYTLPIPTSVIS	17	0
YMYKAAYAGKVIG	18	0
IVYDSPLPSTVFS	17	0
NHYRDALPTTVHG	18	0
SSFRSPLAFSVNS	18	0
HSFLSADALTVST	17	0
SCYNRAMPLLVST	19	0
INYISPAAYQADS	17	0
GAFSPPSAPWVYS	18	0
IKCTDAMALWVNG	18	0
GIYKRAYPTNVNA	17	0
VRCVHALALMAGG	17	0
DKYKSADAEPAVT	17	0
RNFFKASAGYAVA	18	0
YSYCHARPGVVLT	17	0
NEYLLALARVAGT	17	0
NGFLGAYAYGVIS	18	0
RNYRSAPPLLAIS	19	0
VIYSLAFAVWVCA	18	0
PLCGIPAACPVFS	17	0
CAYGVAAPWKAPS	19	0
IVFGAPMPSQVNG	18	0
TIFRYALATRVVT	21	0
INFRMAYAINAFS	17	0
GDFFWADAVSVYS	18	0
SMFCWACPGMAFT	23	0
HIFFPATPILVLA	17	0
GCFLVPSPHIVNS	17	0
DPYYQAPPHTVVA	17	0
YRFFLPSLNVYAG	17	0
ISYWHPFPISAYA	18	0
TTYNEPFARRALG	17	0
TFYMSAQAVHARA	17	0
ARFMFAGPWAVGT	19	0
TLYEVPIAYNVNT	17	0
FSYLVATPLAVTS	17	0
NKFANAHARPVNS	17	0
SNYNVALPYYVIS	17	0
VPFSPAHTGGGSG	17	0
FQFSLALPDEVIT	17	0
TQFTDPCAAGVDG	18	0
FAFFEPWAGCVGA	17	0
SSFYIPKPQLAFA	17	0
GLYRGAYAGSVLS	17	0
DWFLWPPAIDAGG	17	0
FSFEYPTAHCVSG	19	0
ATFSLPIYAVSGG	18	0
TDFCEPNPGLVIS	17	0
NFYLYAYVHSGGG	18	0
CRFCIPLPMCVFA	17	0
TPVPGLVGASGGS	17	0
SHYVRPNARDVYA	17	0
CMFDSPYAQLVYG	17	0
ARFYVAYPMVANS	17	0
FAFGKAFALTVIT	17	0
LRYKSPEALYANA	18	0
APYMNPCPGSVPA	17	0
CGYSRPCAASAIA	18	0
NACIHPVADSVFS	17	0
YEFTNPSAHTVIA	18	0
LSYGAPEAIMVFA	17	0
SLFPGAGAPLVTS	17	0
ILFVQPRAWAVLG	18	0
CWFREASAVVVTT	17	0
ADFEFATAYIAAG	18	0
NFFSRALPNAADT	19	0
NFYTVPHAVSVTT	17	0
STFTCAKASYVVS	18	0
TRFESPTPAGANG	17	0
HKFTYPMALPVRT	18	0
HTYLGAQPTCAFS	17	0
ITYGDPTPRSAYG	19	0
PSFGGALAFDAFA	17	0
ILYLSPVAGRVCT	17	0
LIYDSPQPYKVSS	17	0
TRYYPAGASEAGS	17	0
IAFCDAFAEDVFG	18	0
PVFCGANPTSAPS	17	0
RSYVGPAAHFACT	17	0
HMYIEALRVGSGG	18	0
DSFCEPPAVVAFS	20	0
VRFRAPQPSMVPT	18	0
HYFTNASPIEAST	17	0
FGFCGPAAVIVAG	18	0
HYFGGPFAPAAYS	18	0
IRFLFAVATSVFG	18	0
ILFSTAQPLPAIS	19	0
GVFSRPIADVVFT	18	0
FRYGDPLAGGVFA	19	0
SNFEDANAFGVGT	17	0
FFFPFPPASRACG	17	0
GVFKLPYPKNAYT	17	0
ATYDMPCPEVVLS	17	0
HRYASPLAAGVFG	17	0
DLYCYPGAILVIG	18	0
ILYDAAMPPSAYS	17	0
RLFSFAIPISVYA	18	0
VIFASAIAKTVHA	17	0
RAFLRPSACSAHA	17	0
PQFKYAAASTVCT	17	0
NFFFFAGPPCVLA	18	0
VVFSNPVAMLVIA	17	0
YSYVCASARTVVG	18	0
RNFMSACPMFVCS	17	0
YRYIRANALKAYS	17	0
ITYASPFAAVVAA	17	0
GRFADARACNVPG	18	0
IHFALPPYACTGG	18	0
IVFCSPSPLCVVS	17	0
YDYCSPYASLVFG	17	0
YCFTMANASYAFS	18	0
TSYTYPHALRADS	18	0
LSFVIAGAASAYA	17	0
NGYDAPGAYRVIS	17	0
NFFETAYPILALT	19	0
PEYQWAPASSVCA	17	0
CAYCYPTPSFAVT	19	0
RMFTPAGPAYVTG	17	0
GCYNPASPDIAGA	17	0
DDFTSACARWAFS	17	0
FVFNHPKPYAVIG	17	0
GGYEFPMAHEVGS	18	0
TFFVEAHPVHVNT	17	0
AYFYAPSASSVDA	17	0
DTFCLACPHCVLA	18	0
YDYNLAAPRGVST	18	0
APYHWPCALPVLA	19	0
LLFPRPAALVVFS	18	0
LTYLCANPLSVGT	17	0
VPYVWAIPVLVFT	18	0
LTYKEAVPKHVNT	18	0
PMYLTAMAVNAVT	20	0
CMYSSASATGAYG	17	0
ACFMMPTPRDVFS	17	0
PKFRAAMPILVNS	16	0
FTFWGANPKHVVT	16	0
CTYRFATPMTVFG	17	0
RYFLVPKAWTVYG	16	0
AWFVMAYPDWVRT	17	0
FGYYQASPSSVAS	17	0
AMFVCPDPENVFG	17	0
FLFKQAFPANVAT	17	0
GTFLDPEALDVFA	16	0
RNSRLPSPGCVFG	17	0
YSFGTPNPLTVNT	16	0
LTFVGPFAAWVLG	17	0
RRYAMAVANPVNS	16	0
TVFCSAHAHYVDA	16	0
RVFSHAGAMGVDA	17	0
RTFLSPRPTWVDG	16	0
SIYPHALARVVVS	17	0
GKFARPAACFVPA	16	0
HVFMIAKPSSVSG	16	0
FNYACPFACVVLS	18	0
YTFCHAVPMKVIS	16	0
NRFKRAGPSRVNS	17	0
TIFDFAVPVVVIT	17	0
RVFLGPMANQVHT	16	0
VCYKGAMAPMVDS	16	0
DRYVNAGPLHVNS	16	0
FMFETASPRYVVG	17	0
DLYPSPRPSNANG	18	0
IGYWYPVPFFADA	16	0
NTYAVAGAWLVGT	17	0
SRFSGALSADGGG	17	0
YAYNKALAAVAFA	16	0
LPYGTPTPSFAGT	16	0
DQFCCAYASWVSG	16	0
FPFLLPSPNPVFS	17	0
THYAFPAAFSVCA	16	0
SKFWGAIPCGVSS	17	0
HYYCTAGAYPASG	17	0
FEFRMAMPPHAIT	16	0
AIFPGANAIPAFS	17	0
FLFQVALPSLVYG	17	0
GLFWIPDAVLADS	16	0
VNFGLALAVSVLA	17	0
RGFAFPGAGEAAT	16	0
CFYEYPYPSVAFS	18	0
RTYSCAMPRRVDT	16	0
LVYAGPYPYQVLG	16	0
GAFAEAAPPIVAT	16	0
VQFSTASPGLVHG	16	0
DSFSSAPPVLATS	17	0
GIFKLPLPSLVAS	16	0
FRFTRPSASSVYT	16	0
SVYFAPEPPLADT	16	0
YCFCFAMAFTVDA	16	0
FVYEGAPPEYVVS	16	0
LKYYNAGPCYAVS	16	0
VYYTRAPAGPAST	16	0
FLFGSPVAVIVNT	16	0
DSSFQALATSAST	16	0
LSYVIPYPMTAFS	18	0
ICFFFARPGHAYA	17	0
LAFACACASGALS	16	0
GSYMNAYPQHVDG	16	0
TGFFYPVAIVVLT	17	0
IQFWDPCACMVFG	16	0
CGFWCPWALGVIG	17	0
DGYAPPYARPALA	16	0
IRFPGAQARGAHS	16	0
VVHAGGGSGGGGS	16	0
GKFGPPNAHIVGA	16	0
FGYCAPRARLVGG	17	0
SRFLSANPEHVPT	16	0
FCYTVPGPGLVVA	16	0
CNFLWPWPSVVVA	17	0
NDFWKAIGGGGSG	17	0
SDFGEAVPSRVDT	17	0
HAFNPALALMVSG	16	0
VRFSQAPPPPVGA	17	0
IVFHWACPDVVDT	16	0
HGFRTPLPLSVLS	17	0
CTFHLAGAWLVSA	16	0
PTFPLPIPDCVAS	17	0
CDYTVPSALTVIA	17	0
AAYGEPLARVVFT	17	0
CDFSKASPQRVFS	16	0
HPYVLPFAVPVDG	17	0
FSFRWPSSAWVSG	17	0
ISFALPRACWVFS	17	0
CLYSSPVAILVIT	16	0
VSFCLPPAGKAPG	16	0
GNYVQAQAEDVFG	17	0
RVFCLPVPDSVGG	16	0
SLYVMPCPELANG	17	0
CHYMTALPSVVVS	17	0
VSYEDAVASTAYA	16	0
YGFNWADASWACT	18	0
YSFVGAPARHACG	17	0
HVYTLPLPTAALT	16	0
VTFTVANATVALT	16	0
NGYEDPGPGYVRG	16	0
RSYCQAWAQRADS	17	0
IRYSEPRAFGADS	17	0
SRFGRAVACVVCA	17	0
VTFMGACARVAPS	17	0
SDYVKASAPLVLS	16	0
VSCHRAYARGADS	18	0
GIFFNAWALTVIA	16	0
RCYLFAWPVRVNA	16	0
NVFAQPYARLAFG	18	0
YPFPDAVAFCAYS	16	0
IVFNDAQARHAFS	17	0
FGFSSPAPRAVFA	16	0
LVFTKANAVWVVG	16	0
CGFCAAHPHGAVA	17	0
HSFLIPNARSVDA	16	0
SEFSVPLASFVVT	17	0
PSYVSPPPSAVSS	17	0
NWYLHPAPPVASS	18	0
VHYSNALPVLVGG	16	0
DCFPTPLALCVLT	16	0
VHYPVAVPSNVNT	16	0
GEFLRAEPYRACG	16	0
DEFGKPRPKGADT	16	0
NGFPHPSPSMAPA	17	0
SPYRIAFPSRAIA	16	0
GLFARPMPASVYS	17	0
FSFVDAVALPVLS	17	0
AQYAFASPFVVHG	16	0
LKYFSAPAVIVST	16	0
SGYIHAWPVLAFA	17	0
CKYDHPSPHYAHS	16	0
TDYPANAWKVRAC	16	0
DMYSIACAVTVFG	16	0
YLSSHARAGGASA	16	0
FCYCSPWPTLVVT	16	0
ILFIWAMAPEAIT	17	0
VVYGYASASVACS	16	0
IYLMPRPNGAITV	17	0
TSYMLPRAGLVDG	16	0
TDYLGATPQTAIS	17	0
CRFVAPALHVFSG	16	0
IRYLEAYALLVGA	17	0
LSFGPPRPHCAYG	16	0
CSFLHPMATTASG	16	0
TNFKGAEALLVPS	16	0
FSFGYAVATHVTT	16	0
VGYSTPIPARVYG	16	0
CLFLLAVPGTGGG	16	0
VSYLIANPAMVYA	17	0
CEYKHAMPQRVAS	15	0
AMFRVPSAFSVCT	15	0
SSYAHPAPYVVDA	16	0
GVYYGAYPDHAPT	15	0
SPYGCPKASKVIG	15	0
AMFLRAEAKDAIA	15	0
FEAQGALANIAVD	17	0
SVFGYPSARWALG	15	0
DLFWSAKPGSVFS	15	0
CVFLSAEAEVVIS	15	0
SPFWLAYPMHAFT	15	0
HDYGLAMPKYAVG	15	0
RRYINALPSTVCT	15	0
IRFLRPCALLVFS	15	0
PNYEDPHPLRVIS	16	0
TQYAIAGPIAAYT	15	0
IHFNSAVADEVYA	15	0
GFYSLANAVNVSA	17	0
YDYKDAYVSGGGS	16	0
FRYGTALAVNVYS	18	0
YSYCFANASYVIT	15	0
VNYTDPYPNSVHT	16	0
CGFNIAQALVAVG	17	0
SYFQVALAYDVSS	15	0
STFPVRACSGGGS	15	0
VWFIPAVPGIVGS	15	0
TRYTRAHAYLVLG	15	0
RSYPFAIPETVSA	15	0
NKFSRPRAFIALT	16	0
SLYPPAWPFLVIG	16	0
NPFFWAPALTVSS	15	0
SMYSTAFNTGGGS	15	0
GVRAYPLMVVAGG	15	0
NHFEIPLAFIALT	15	0
YSFHSARASIVIT	15	0
ILYSGANAFFVDG	15	0
YMYEGASPLQVVS	16	0
TYYHLPSATQVVS	16	0
CFFENPGALNAFA	15	0
NYFHLPLAYHARS	15	0
TDYINAVPTHAFT	16	0
RYFPGAMPNCAFG	16	0
IVFKLAYAVHAYS	15	0
LVFVAPLASVAVS	15	0
LRFLDAVAVRAVT	15	0
HAYLRPGPAIVHG	15	0
DRFSDPSPDYVHA	15	0
CSFPRAFACAVPT	16	0
SIYCSPCARQAHS	18	0
STYTGACAQQVFG	15	0
SLYQTPRAYLVFA	16	0
HRYHWANAYLVCA	16	0
GCFTSPLPVCVIG	16	0
VSFRNPVAAIAFT	15	0
NKYVMARASGAHS	15	0
AFYAHPFAVLASG	16	0
FAYYGPSAISAAG	15	0
FGFHKASAKVVFT	16	0
NVYTFPAAHTVST	15	0
YDYLFARAPGASG	15	0
PSFFIAFARIVGS	16	0
CRFSNARPDFVYT	15	0
DSFTQPCAHVVLT	15	0
FCFPWPFPPAVGG	15	0
GSFELATASQVDG	15	0
PLYRVPVAETVYG	15	0
IMFLEAPAHLACT	16	0
GLYNSPSAPRVFG	15	0
CSYVGALACMVFS	15	0
IVFIDPDALTVCS	15	0
PIFCWASAQLACA	15	0
NEYWCPDPFNVYG	15	0
DWFLEPSAHGVGA	15	0
CWYGHPLATSVLT	16	0
ISFPRALAQSVSS	15	0
DLYCGPRAFCVYT	15	0
APYANASASIVVG	15	0
LTFELAGAFNAVT	15	0
FLYESALACIAST	16	0
HEYEGPNPLLAPG	16	0
THYSWADPIRVDT	16	0
LCFKHARPRAVTS	16	0
LSYGMPLPLKVCA	15	0
HTFGFPHAYPVFS	15	0
TWFAGAVANPVYT	15	0
LGYELAPPPTVSS	15	0
CYYLQARAFCAFA	16	0
SCYNLANATRVDT	16	0
LWFGGANAQAVCT	16	0
APFTFAKASSAST	16	0
RMYWVAFANNACT	15	0
LVYAVAAATEAYT	15	0
NLFSIAAPLRACA	15	0
FRFSLALPIDVDT	16	0
LVFSAPHASRVVT	15	0
LFFNIARASFAFG	15	0
LHYKTALPCGAFT	19	0
FSYSEPWPSLVLG	15	0
NCFPAPKPLSAFT	15	0
NLYSSAVPHSANG	15	0
GSFTVPLARFAST	15	0
NKYYQAGAEAAFT	15	0
IGFITAIAGSGGG	15	0
GCYMHPFPLEVLG	15	0
DRYLPPNPSSVLT	16	0
CFYCFAFPFLAIS	15	0
HVYWPPRAHKVSS	17	0
TDYCTARPVRAYA	15	0
SPFSLAVPALVHS	16	0
SRSSWPNIANTGG	15	0
IMFPCPLPGAAST	16	0
YLFLSPSAYRVFT	16	0
NRFDKALPNGAPT	16	0
HVFSLAPPAHVSS	16	0
AWFHLPIPCQVFG	15	0
VDFCPALACGVNS	15	0
IMFEGPCASNVYS	16	0
TFFQSAPANDVDA	16	0
LLYEHPLAWPVVT	15	0
FGFTRPYPSIATG	15	0
PSYRRPSPNVAVA	15	0
YSFVTPSPILVNS	15	0
DYFQCAHVYAGGG	16	0
CGCMPPTPKKVIT	16	0
YKYNPATAKCVCT	16	0
VIYRGPLAEEAFG	15	0
VNYFHPIPRGVFT	15	0
YDYLGPTPLSVFT	15	0
CYFGSARARFVNS	17	0
VFFTVPFAAVVVT	15	0
CVYMLAGPVLAYS	15	0
GSCALAGQAYSGG	17	0
DFYGPAAANEASG	15	0
ALYGAARAPCAIA	15	0
FSFCFPVASAVFS	15	0
DSYVSAWACKVSG	15	0
LVYAYASAGHVLA	16	0
GCFPSPGASLARS	15	0
YTYADACADGVVL	15	0
VMYLRPTHVSTGG	17	0
LLYFKAMAGVVRG	15	0
NVYSCPAAFPVFG	15	0
PSFACAVALGVVS	15	0
IKFDRADALPVVA	16	0
YHFHQPFARPAGS	16	0
PGFLQAVALFVTS	15	0
TKFFSAHPPQATT	16	0
FRFYKPSPMVVSA	15	0
CRFGMAYPGIVLT	15	0
LSYCYPIPGSACG	16	0
IPFYYPSPKRVNA	16	0
LNFLPPFPMQVSG	15	0
DGYWSPNPLAASS	16	0
ASFSTAIAKIVVA	17	0
LRFPFAPASWAGG	15	0
ATYLCPRPHWAGA	15	0
GSYLLPYAGEVFG	15	0
GSFRTAYALRVGG	15	0
TNYGWPQAVAAVS	15	0
TVFTDAKASGVVA	16	0
TYYQSAGPTNVYS	16	0
LWYYFPTAFVVCT	15	0
SQFSAPCPGSARS	16	0
FLYSRPNAFVASS	16	0
[truncated: 1,615 more rows]
